# Supplementary material for: Pangolin genomes and the evolution of mammalian scales and immunity
Source: HighWire-hosted journal article supplement (doi:10.1101/gr.203521.115), 2016-08-10
Supplement: Supplemental_Material.pdf [file Supplemental_Material.pdf]

# **Pangolin genomes and the evolution of mammalian scales and immunity**

## **The International Pangolin Research Consortium (IPaRC)**

Siew Woh Choo, Mike Rayko, Tze King Tan, Ranjeev Hari, Aleksey Komissarov, Wei Yee Wee, Andrey A. Yurchenko, Sergey Kliver, Gaik Tamazian, Agostinho Antunes, Richard K. Wilson, Wesley C. Warren, Klaus-Peter Koepfli, Patrick Minx, Ksenia Krasheninnikova, Antoinette Kotze, Desire L. Dalton, Elaine Vermaak, Ian C. Paterson, Pavel Dobrynin, Frankie Thomas Sitam, Jeffrine J. Rovie-Ryan, Warren E. Johnson, Aini Mohamed Yusoff, Shu-Jin Luo, Kayal Vizi Karuppannan, Gang Fang, Deyou Zheng, Mark B. Gerstein, Leonard Lipovich, Stephen J. O'Brien and Guat Jah Wong

## **Supplemental Information**

### **1.0 GENOME SEQUENCING, ASSEMBLY AND SCAFFOLDING**

#### **1.1 DNA Extraction and whole-genome sequencing**

#### **1.2 Data pre-processing and Next-Generation Sequencing (NGS)**

libraries reads statistics

#### **1.3 Genome assembly, scaffolding and gap closing**

##### **1.3.1 Malayan pangolin genome**

##### **1.3.2 Chinese pangolin genome**

#### **1.4 Genome size estimation**

#### **1.5 NGS reads based characterisation**

### **2.0 EVALUATION OF GENOME ASSEMBLIES**

#### **2.1 Mapping Malayan pangolin transcripts to assembled genomes**

#### **2.2 CEGMA analysis**

#### **2.3 Pangolin genome comparison**

### **3.0 GENOME ANNOTATION**

#### **3.1 Protein-coding gene annotation**

##### **3.1.1 Multiple functional assignments of genes**

#### **3.2 Pseudogene identification**

#### **3.3 Non-coding genes**

#### **3.4 Segmental duplications**

### **4.0 SPECIATION TIME AND DIVERGENCE TIME**

### **5.0 HETEROZYGOSITY**

## 6.0 PANGOLIN POPULATION HISTORY ESTIMATION

## 7.0 VALIDATION OF PSEUDOGENIZED GENES

## 8.0 GENE FAMILY EXPANSION AND CONTRACTION ANALYSIS

## 9.0 POSITIVE SELECTION ANALYSIS

## 10.0 REPETITIVE ELEMENTS ANALYSIS

### 10.1 RepeatMasker

### 10.2 Tandem repeats

## 11.0 SHORT NOTES ON PANGOLIN MUSCULOSKELETAL SYSTEM

## 12.0 REFERENCES

## 1.0 GENOME SEQUENCING, ASSEMBLY AND SCAFFOLDING

### 1.1 DNA extraction and whole-genome Sequencing

Malayan pangolins are mainly from Southeast Asia, whereas the Chinese pangolins are mainly from China, Taiwan and in some Northern of Southeast Asia (**Supplemental Figure S1.1**). For Malayan pangolin, we used a female wild Malayan pangolin for the study. The animal was provided by the Department of Wildlife and National Parks (DWNP) Malaysia under a Special Permit No. 003079 (KPM 49) for endangered animals. DNA was extracted using the Qiagen 20/G genomic tip following manufacturer's protocol. Libraries for the Malayan pangolin genome were constructed and the different insert sizes of the libraries were used: 180bp, 500bp, 800bp, 2kb, and 5kb (**Supplemental Table S1.1**). The libraries were sequenced using Illumina HiSeq 2000 at BGI, Hong Kong.

For Chinese pangolin, the DNA was derived from a single female animal (sample ID=MPE899) collected in the island of Taiwan. The library plan followed the recommendations provided in the SOAPdenovo assembler manual (Luo et al. 2012). Libraries for the Chinese pangolin genome were constructed and the different insert sizes of the libraries were used: 200-300 bp, 3 kb and 8 kb.

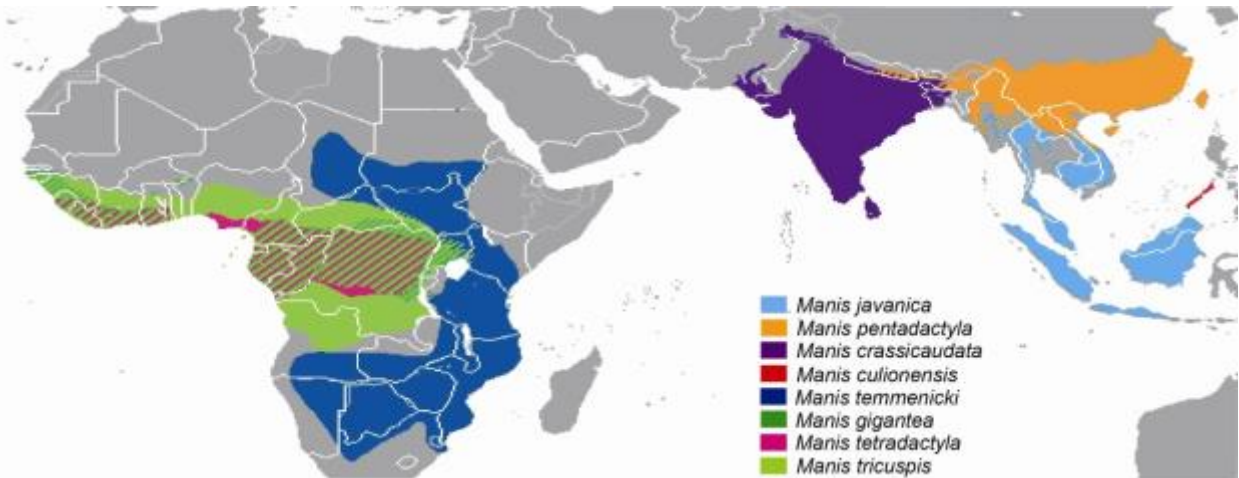

**Supplemental Figure S1.1. Pangolin distribution and comparisons.** Geographical distribution maps of the pangolins. There are eight known pangolin species represented by different colors in the map. The hash mark on the map means overlap of geographic areas where more than one species inhabit the same range. (Source: Modified picture from [https://commons.wikimedia.org/wiki/File:Manis\\_ranges.png](https://commons.wikimedia.org/wiki/File:Manis_ranges.png))

## 1.2 Data pre-processing and Next-Generation Sequencing (NGS) libraries reads statistics

For Malayan pangolin the quality of the sequenced reads was assessed by FastQC tool(Andrews). For Malayan pangolin, the sequencing reads were filtered using PRINSEQ(Schmieder and Edwards 2011) with an average quality score above 20. The resulting filtered sequences were then error-corrected using MUSKET 1.1(Liu et al. 2013). The error-corrected reads were subsequently used for *de novo* genome assembly.

For Chinese pangolin, all production data received automated comprehensive quality checks to confirm each sample has met specific metrics related to quality (>20 score minimum) and coverage. Quality control of WGS data was evaluated using the PICARD software package (<http://broadinstitute.github.io/picard>) module CollectWGSMetrics which provides both depth and breadth of coverage measurements.

**Supplemental Table S1.1:** An NGS library reads statistics. Number of reads for each library and the estimated sequencing coverage are shown. The sequencing coverage was estimated based on the predicted genome size of Malayan pangolin (2.5Gbp) and Chinese pangolin (2.7Gbp) by *k*-mer analyses (Supplemental Figure S1.2).

|                         |              |                                |                     | 98  |
|-------------------------|--------------|--------------------------------|---------------------|-----|
| Library                 | Library Type | Total Paired-End (PE)<br>Reads | Sequencing Coverage | 99  |
| <b>Malayan pangolin</b> |              |                                |                     | 100 |
| PE 180bp                | Paired End   | 189,915,801                    | 15.19               | 101 |
| PE 180bp                | Paired End   | 212,107,889                    | 16.97               | 102 |
| PE 500bp                | Paired End   | 160,493,968                    | 12.84               | 103 |
| PE 500bp                | Paired End   | 176,434,714                    | 14.11               | 104 |
| PE 500bp                | Paired End   | 165,713,431                    | 13.26               | 105 |
| PE 800bp                | Paired End   | 115,914,999                    | 9.27                | 106 |
| PE 800bp                | Paired End   | 130,704,648                    | 10.46               | 107 |
| PE 800bp                | Paired End   | 129,334,465                    | 10.35               | 108 |
| MP 2000                 | Mate-pair    | 115,649,108                    | 9.25                | 109 |
| MP 5000                 | Mate-pair    | 115,639,514                    | 9.25                | 110 |
| MP 5000                 | Mate-pair    | 154,755,684                    | 12.38               | 111 |
| MP 5000                 | Mate-pair    | 154,736,404                    | 12.38               | 112 |
|                         |              |                                | Total: 146.07       | 113 |
| <b>Chinese pangolin</b> |              |                                |                     | 114 |
| PE 206                  | Paired End   | 437,447,710                    | 32.40               | 115 |
| PE 356                  | Paired End   | 296,308,797                    | 21.94               | 116 |
| MP 3000                 | Mate-pair    | 25,634,681                     | 1.90                | 117 |
| MP 8000                 | Mate-pair    | 1,172,455                      | 0.08                | 118 |
|                         |              |                                | Total: 56.32        | 119 |

### 1.3 Genome assembly, scaffolding and gap closing

#### 1.3.1 *Malayan pangolin* genome

The genome assembly was performed using CLC Assembly Cell 4.10, SGA-0.10.10(Simpson and Durbin 2012) and SOAPdenovo2(Luo et al. 2012). The three generated genome assemblies

were compared based on N50 metric using QUAST(Gurevich et al. 2013). After mapping the reads back to the assemblies, the Feature Response Curve (FRC) was produced using the FRCbam program(Vezzi et al. 2012). The sequencing reads were mapped back to the genomes and cumulative feature density were plotted for each genome assembled using CLC, SOAPdenovo2 and SGA-0.10.10(Luo et al. 2012; Simpson and Durbin 2012). The higher the number of features per cumulative nucleotide size, the assembly was regarded to be better. In order to further validate the assembly, the assembled RNA-seq transcripts from Trinity(Grabherr et al. 2011) were mapped to these assemblies. The assembly with best FRC curve and high RNA-seq mappings were regarded as the best assembly and used for the scaffolding step. Using the scaffolder module in SOAPdenovo2, the contigs were scaffolded. The scaffolded genome assemblies were used for subsequent validation analysis.

To choose the optimal assembly from the pangolin assemblies generated from the three different assemblers, we compared them using Feature Response Curve, where the steepest curve denotes the best assembly while covering the estimated genome size of 2.5Gbp (**Supplemental Figure S1.2**). The CLC assembler-generated assembly (N50: 13,423) fell short for the genome coverage metric while SOAPdenovo2-generated assembly (N50: 4,836) showed good coverage yet the SGA-generated assembly (N50: 17,568) contained slightly less genomic features hence a slightly steeper curve. Taken all together, we concluded that the SGA-generated assembly was the best and used it for subsequent analyses.

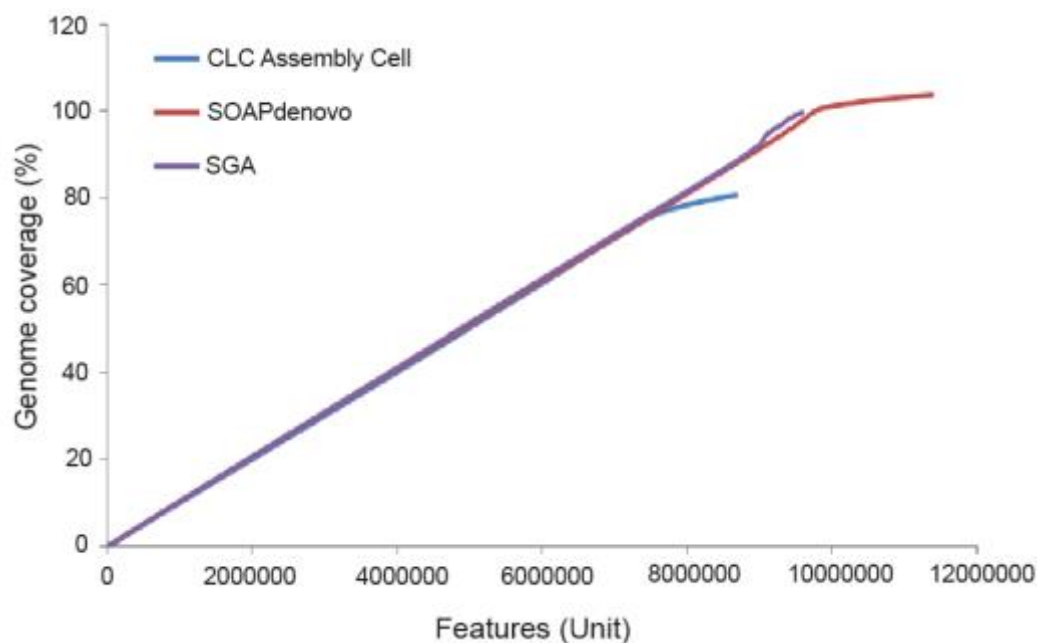

**Supplemental Figure S1.2. Feature response curves.** Comparison across three different assemblies showed cumulative features per genomic coverage plot of the three different assemblies of Malayan pangolin.

The selected final SGA-generated assembly was scaffold using SOAPdenovo2 scaffolder achieved better contiguity statistics where the final scaffold N50 is 204,525 (**Supplemental Table S1.2**). The resulted scaffolds which had many ambiguous gap positions with Ns were gap-closed and this step improved the contig N50 to 18,812 bp.

**Supplemental Table S1.2. Summary genome assembly statistics for Malayan pangolin.**

|                                         | Paired-end insert size                  | Estimated coverage (X) | N50 (bp) | Total length (bp) |
|-----------------------------------------|-----------------------------------------|------------------------|----------|-------------------|
| <b>Initial contig (&gt;1k)</b>          | 180bp, 500bp, 800bp                     | 102.45                 | 17,568   | 2,047,445,145     |
| <b>Final scaffold (&gt;1k)</b>          | 180bp, 500bp, 800bp, 2000bp, and 5000bp | 145.66                 | 204,525  | 2,549,959,554     |
| <b>Final contig (after gap-closing)</b> |                                         |                        | 18,812   | 2,108,780,390     |

### 1.3.2 Chinese pangolin genome

Total assembled sequence coverage of Illumina instrument reads was approximately 56X (using a genome size estimate of 2.7Gbp. The first draft assembly was performed with SOAPdenovo v1.0.5 and was referred to as *M. pentadactyla* 1.0. In the *M. pentadactyla* 1.0 assembly, small scaffold gaps were closed with Illumina read mapping and local assembly. Contaminating contig and trimmed vector in the form of X's and ambiguous bases as N's in the sequence were removed. The National Center for Biotechnology Information (NCBI) requires that all contigs with genomic size less than 200bp to be removed. Removing these small contigs was the laststep in preparation for submitting the final 1.1.1 assembly. The *M. pentadactyla* 1.1.1 assembly is made up of a total of 92,722 scaffolds with an N50 scaffold length of 118,853bp (N50 contig length=28,718bp). Including gaps, the total assembly spans about 2.2Gbp (**Supplemental Table S1.3**).

To improve assembly and increase scaffold N50 length, the resulting Chinese pangolin assembly was scaffolded using L\_RNA\_scaffolder approach, with the support of Malayan pangolin transcriptomic data(Xue et al. 2013). It has reduced the number of scaffolds to 87,621 with N50 of 157,892bp.

**Supplemental Table S1.3. Summary genome assembly statistics for Chinese pangolin.**

| Assembly                        | Contigs       | Scaffolds     | L_RNA scaffolding |
|---------------------------------|---------------|---------------|-------------------|
| # contigs/scaffold (>= 0 bp)    | 230,930       | 92,772        | 87,621            |
| # contigs/scaffold (>= 1000 bp) |               | 38,256        | 33,682            |
| Total length (>= 0 bp)          | 1,999,057,008 | 2,204,732,179 | 2,205,289,822     |
| Largest contig/scaffold         | 292,755       | 1,317,973     | 1,402,852         |
| N50                             | 28,718        | 118,853       | 157,892           |
| # N's per 100 kbp               | 0             | 9385.12       | 9407.54           |

#### 1.4 Genome size estimation

To estimate the genome size,  $k$ -mer was counted using the tool called Preqc from the String Graph Assembler (SGA) assembly program(Simpson and Durbin 2012). The tool counts and plots 31-mer histogram from 20,000 reads and estimates the genome size by identifying the peak of the Poisson distribution. The tool also accounts for bias for heterozygosity and performs correction as required. The estimation is based on the principle as follows, where the mean number of times a unique genomic  $k$ -mer appears in the reads,  $\lambda_k$  is as follows:

$$\lambda_k = \frac{n(l-k+1)}{G}$$

Where  $n$  is the number of reads,  $l$  is the read length and  $G$  being the genome size. By pooling all the short-insert reads for estimation, the genome size of Malayan pangolin and Chinese pangolin was estimated to be 2,492,544,425 bp and 2,696,930,760 bp, respectively (**Supplemental Figure S1.3**).

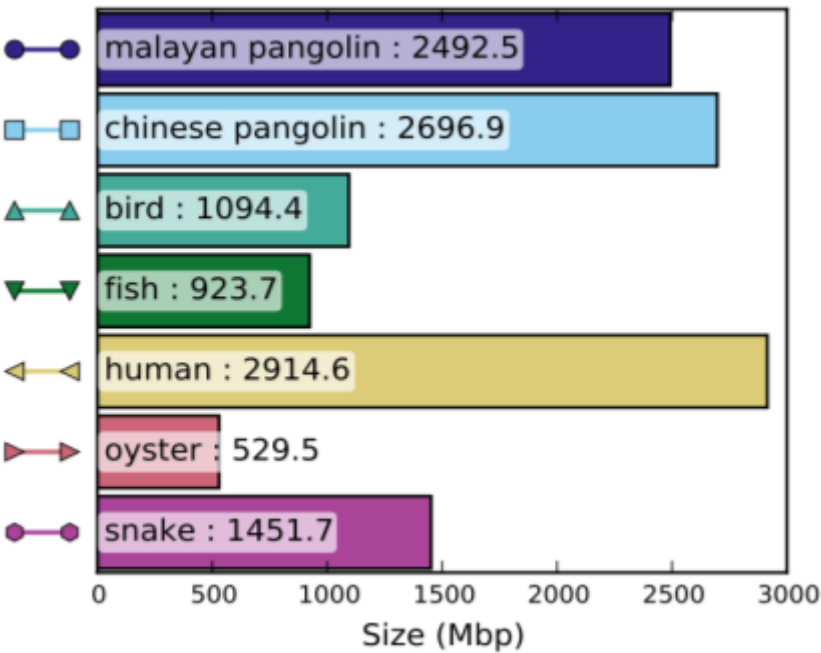

**Supplemental Figure S1.3.** Genome size prediction of the Malayan and Chinese pangolins compared to other organisms using 31-mer counting. The datasets of other organisms used in this analysis were from previous study(Bradnam et al. 2013). Bird=*Melopsittacus undulatus*; Fish=*Maylandia zebra*; Oyster=*Crassostrea gigas*; and Snake=*Boa constrictor constrictor*.



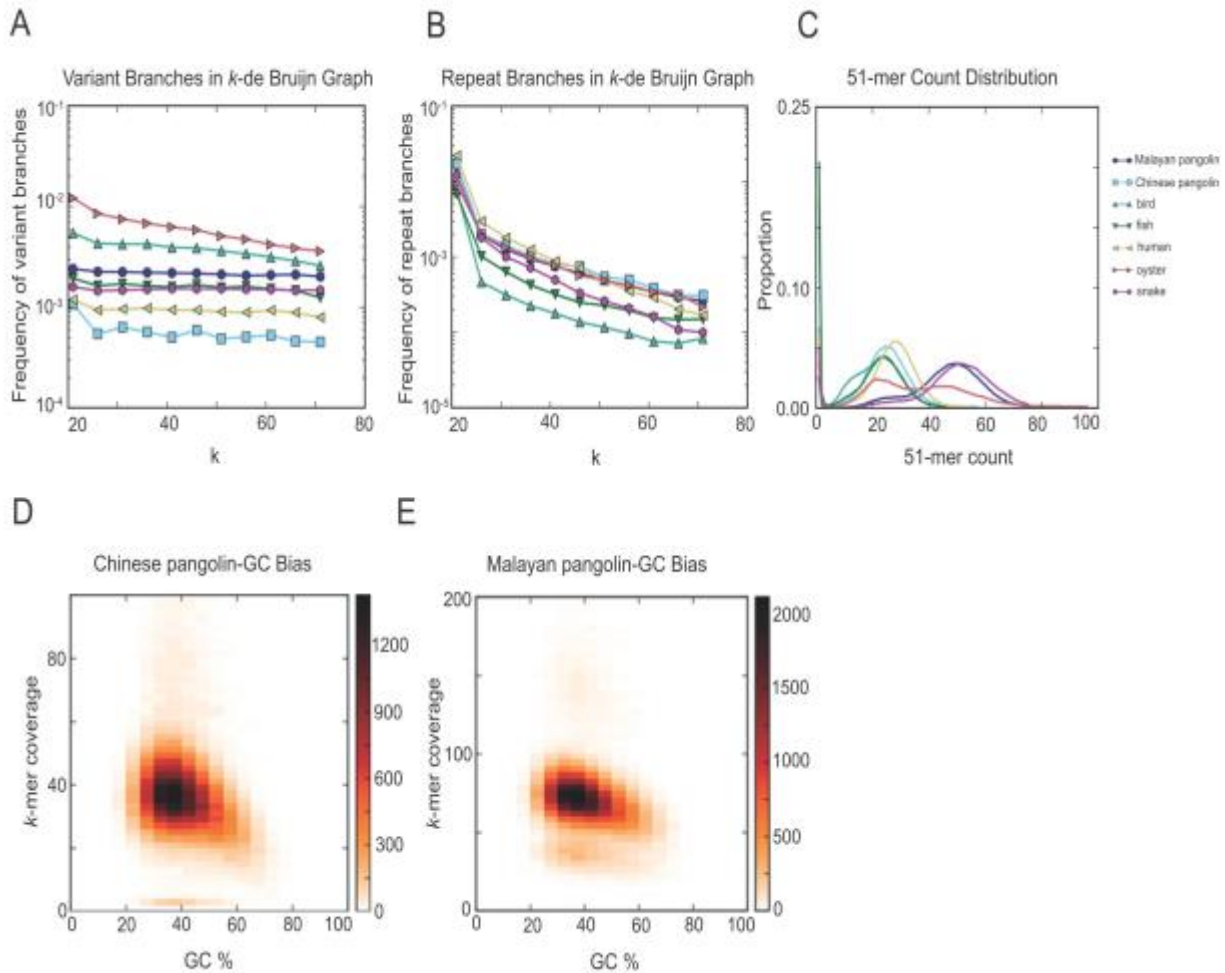

**Supplemental Figure S1.4. NGS reads based characterisation of pangolin assemblies.** (a) Frequency of variants branches in the  $k$ -de Bruijn graph. The Malayan pangolin genome is expected to be highly heterozygous like the bird genome and is expected to have higher heterozygosity compared to the Chinese pangolin which possesses lower variant branches. (b) Frequency of repeats branches in the  $k$ -de Bruijn graph. Like oyster genome, high number of repeats content is to be expected in the Malayan and Chinese pangolin. (c) 51  $k$ -mer distribution. The data for Malayan pangolin followed a bimodal curve while the Chinese pangolin appears unimodal. The second peak is the true genomic  $k$ -mers of which when abundant, aids to better assemble the genome. Therefore, the Malayan pangolin reads appear to have abundant  $k$ -mers required for proper assembly. (d) GC content plot of the Chinese pangolin genome. (e) GC content plot of the Malayan pangolin genome.

211 **2.0 EVALUATION OF GENOME ASSEMBLIES**

212 **2.1 Mapping Malayan pangolin transcripts to assembled genomes**

213 We have 89,754 consensus transcripts/UniGenes generated by combining transcriptomic  
214 fragments from three different assemblers: Trinity(Grabherr et al. 2011), SOAPdenovo(Luo et al.  
215 2012) and Velvet(Zerbino and Birney 2008) in our Malayan pangolin transcriptome project  
216 (manuscript in preparation). Briefly we sequenced the transcriptomes of eight pangolin organs  
217 including cerebellum, cerebrum, lung, heart, kidney, liver, spleen and thymus using Illumina  
218 HiSeq technology platform (2x100bp strategy). We *de novo* assembled the pooled sequencing  
219 reads from the eight samples using three different assemblers independently. The assembled  
220 transcriptomic fragments/transcripts were clustered using CD-Hit-EST program(Huang et al.  
221 2010) with a clustering threshold of 98% sequence identity. The longest sequence representatives  
222 in each clustered transcripts were selected and classified as the UniGenes. We selected the  
223 89,754 consensus UniGenes (the transcript clusters that have transcripts generated from the three  
224 different assemblers) for this analysis.

225  
226 Both pangolin assemblies were mapped using the set of 89,754 consensus transcripts (as well as  
227 the set of 1,035,201 transcripts generated by Trinity alone(Grabherr et al. 2011)) using GMAP  
228 software(Wu and Watanabe 2005). The summary of the percentage of mapped consensus  
229 UniGenes and the Trinity-generated transcripts were calculated (**Supplemental Table S2.1**). In  
230 general, at least 93% of the transcripts were mapped to both pangolin assemblies for both sets of  
231 pangolin transcripts that we used, indicating the high quality of our assemblies for genome  
232 annotation.

233 **Supplemental Table S2.1. Summary statistics of the mapped consensus UniGenes and Trinity-**  
234 **generated transcripts.**

| <b>89,754 Consensus Unigenes</b>                                                |                         |                         |
|---------------------------------------------------------------------------------|-------------------------|-------------------------|
|                                                                                 | <b>Malayan pangolin</b> | <b>Chinese pangolin</b> |
| Unmapped transcripts                                                            | 282 (0.31%)             | 4654 (5.19 %)           |
| High quality mapped transcripts (alignments with 92% identity and 80% coverage) | 75321 (83.91%)          | 58125 (64.76 %)         |

|                                                                                 |                         |                         |
|---------------------------------------------------------------------------------|-------------------------|-------------------------|
| Mapped transcripts                                                              | 14151 (15.76%)          | 26975 (30.05%)          |
| <b>1,035,201 Trinity-generated Transcripts</b>                                  |                         |                         |
|                                                                                 | <b>Malayan pangolin</b> | <b>Chinese pangolin</b> |
| Unmapped transcripts                                                            | 8419 (00.81%)           | 58326 (5.63 %)          |
| High quality mapped transcripts (alignments with 92% identity and 80% coverage) | 907603 (87.67%)         | 712245 (68.80 %)        |
| Mapped transcripts                                                              | 119179 (11.51%)         | 264630 (25.56%)         |

235

## 236 2.2 CEGMA analysis

237 We evaluated the genome assembly quality of Malayan pangolin with the Core Eukaryotic  
238 Genes Mapping Approach (CEGMA) pipeline(Parra et al. 2007). CEGMA is a computational  
239 method that relies on a defined set of ultra-conserved eukaryotic protein families for building a  
240 highly reliable set of gene annotations. The gene space completeness of the pangolin assemblies  
241 was given by the CEGMA pipeline identified and the complete hits and partial hits were taken  
242 into account. The gene space completeness statistics showed that our draft genome is a good  
243 candidate for genome annotation and subsequent analysis as it has high gene space completeness  
244 level similar to other eukaryotic genome projects. We used a set of 248 core ultra-conserved  
245 genes typical in a CEGMA analysis. Our analyses indicated 91% ultra-conserved eukaryotic  
246 genes present in the Malayan pangolin genome and 58% were considered complete genes. The  
247 "complete genes" denotes high confident alignments (with an internal threshold) using an  
248 ENSEMBL method of BLAST, Genewise and GeneID searches, which also includes Hidden  
249 Markov model (HMM)-profiled protein sequences to increase its reliability in predicting the  
250 ortholog's gene structures. For the Chinese pangolin assembly, we found 88% ultra-conserved  
251 eukaryotic genes present in this genome, 55% of which were considered complete genes.

252

## 253 2.3 Pangolin genome comparison

254 We also aligned the Chinese pangolin genome sequence with the Malayan pangolin genome  
255 sequence using the MUMmer software(Delcher et al. 2003). We found 91% of the Chinese

pangolin assembly covered 78% of the Malayan pangolin assembly with 92% sequence identity. The low genome similarity supports our view that both pangolin species are highly divergent.

### **3.0 GENOME ANNOTATION**

#### **3.1 Protein-coding gene annotation**

To predict genes in the pangolin genomes, we used the MAKER annotation pipeline based on several sources of evidence: (i) *ab initio* gene prediction, (ii) transcriptomic data from Malayan pangolin and (iii) protein evidence from *Canis familiaris* reference genome and transcriptome (Cantarel et al. 2008). We identified 23,446 and 20,298 protein-coding genes in the Malayan and Chinese pangolin genomes, respectively (**Supplemental Table S3.1**). We attempted to assign orthology between the annotated genes of two pangolin species. Of the 23,446 and 20,298 predicted genes for Malayan and Chinese pangolins, we found 12,599 orthologous groups, as well as 10,772 and 7,523 orphans, respectively. We believe that the difference between the gene counts is mainly due to the high level of diversification and divergence within pangolins likely from evolutionary adaptations to different environments, especially the Malayan pangolin was originated from megadiverse Malaysia expected to have high heterozygosity rate compared to the Chinese pangolin originated from an isolated island population. The Malayan pangolin genome has 170,236 exons, whereas the Chinese pangolin genome has 147,455 exons. The total exon length accounted for approximately 1.81% and 1.34% of the Malayan and Chinese pangolin genomes, respectively. All protein-coding genes were annotated using different databases (**Supplemental Information S3.1.1**).

**Supplemental Table S3.1. Summary of genome annotation for both pangolin genomes.**

|                              | Malayan pangolin | Chinese pangolin |
|------------------------------|------------------|------------------|
| Number of genes              | 23,446           | 20,298           |
| Number of exons              | 170,236          | 147,455          |
| Number of<br>five_prime_UTR  | 10,925           | 8,535            |
| Number of<br>three_prime_UTR | 10,919           | 8,817            |
| Total exons length (bp)      | 45,284,578       | 36,081,291       |

**3.1.1 Multiple functional assignments of genes**

For functional annotation of pangolin MAKER-generated protein-coding genes, we used InterProScan 5 pipeline(Jones et al. 2014). The number of genes in two pangolins with homologs of functional assignment from various databases including InterPro, GO, KEGG, Swissprot and TrEMBL (**Supplemental Table S3.2**). Encouragingly, all MAKER-generated protein-coding genes had functional assignments from at least one database.

**Supplemental Table S3.2. Functional annotation of protein-coding genes.**

|           | Malayan pangolin   |                            | Chinese pangolin   |                            |
|-----------|--------------------|----------------------------|--------------------|----------------------------|
|           | Number of<br>genes | Percentage of<br>genes (%) | Number of<br>genes | Percentage of<br>genes (%) |
| Total     | 23,448             | 100                        | 20,298             | 100                        |
| InterPro  | 23,446             | 100                        | 20,298             | 100                        |
| GO        | 14,996             | 64.0                       | 13,632             | 67.2                       |
| KEGG      | 899                | 3.8                        | 1,195              | 5.9                        |
| Swissprot | 17,408             | 74.2                       | 19,038             | 93.8                       |
| TrEMBL    | 21,474             | 91.6                       | 19,238             | 94.8                       |

### 3.2 Pseudogene identification

Pseudogene screening for both Malayan pangolin and Chinese pangolin genomes were performed using Pseudopipe pipeline(Zhang et al. 2006). Maker-annotated protein sequences were used to identify all possible pseudogenes present in pangolin genomes. All protein sequences were BLASTed against the genome sequences. The e-value cut-off ( $\leq 1 \times 10^{-4}$ ) was used to identify significant homologous hits. The BLAST hits were then partitioned according to the scaffold ID and strand direction. BLAST hits that had overlap >30bps with the functional genes were discarded. The partitioned BLAST hits were then categorized into different sets based on the match of the hits on the similar or different query protein. Each disjoint set was further merged into single super-hit or pseudo-exon. The pseudo-exon was further extended to both directions for 30 nucleotides to achieve optimal alignment by using the tfasty program from the fasta suite that refines the BLAST result for identification of frameshift, stop codons, indels and calculates accurate sequence similarity(Pearson and Lipman 1988). To get high quality pseudogene prediction, the output results were further filtered based on the sequence similarity cut-off (>40%), BLAST e-value  $< 1 \times 10^{-10}$  and the predicted pseudogenes must cover at least 70% of the parent genes. The pseudogenes were classified into processed pseudogene (retrotransposed pseudogene) and duplicated pseudogenes. Processed pseudogene were pseudogenes lack of intron, possessed small flanking direct repeats and a 3' polyadenine tail, whereas the duplicated pseudogenes has multiple exons.

Genome-wide screening of pseudogenes revealed a total of 3,316 pseudogene in the Malayan pangolin, which includes 2,649 processed pseudogenes (79.8%) and 667 duplicated pseudogenes (20.1%) (**Supplemental Table S3.3**). On the other hand, a total of 1,577 pseudogenes were found in the Chinese pangolin genome including 1,227 processed pseudogenes (77.8%) and 350 duplicated pseudogenes (22.1%). The number of pseudogenes in both pangolin species are lower than the number of predicted pseudogenes in human and dog.

**Supplemental Table S3.3. Pseudogene identification across different mammalian species.** Number of processed and duplicated genes are shown for each species. The numbers in bracket are the percentage of pseudogenes. The human and dog pseudogene datasets were from [www.pseudogene.org](http://www.pseudogene.org).

| Pseudogene Type | Malayan pangolin | Chinese pangolin | Dog              | Human            |
|-----------------|------------------|------------------|------------------|------------------|
| Processed       | 3637<br>(78.05%) | 1859<br>(76.95%) | 6075<br>(86.23%) | 8522<br>(82.25%) |
| Duplicated      | 1023<br>(21.95%) | 557 (23.05%)     | 970 (13.77%)     | 1839<br>(17.75%) |
| Total           | 4610             | 2416             | 7045             | 10361            |

### 3.3 Non-coding genes

Non-coding RNA genes were annotated using RFAM sequence database and Infernal engine (v.1.1.1), according to Ensembl recommendations (<http://www.ensembl.org/info/genome/genebuild/ncrna.html>). Genomic sequences were aligned against RFAM database using BLASTN with  $e=10^{-5}$ . The BLAST hits were clustered and used to seed Infernal searches with the corresponding RFAM covariance models. The resulting BLAST hits were used as supporting evidence for ncRNA genes confirmed by Infernal.

A total of 1,594 and 1,506 miRNAs from the Malayan and Chinese pangolin genomes, respectively were identified using two complementary approaches *ab initio* with HHMMiR(Kadri et al. 2009) and MiRPara(Wu et al. 2011), by similarity to known miRNA genes in miRBase(Griffiths-Jones 2006; Griffiths-Jones et al. 2008). The miRNA sequences accounted <1% of the pangolin genomes with the TE-related mir-9256a-1 and MIR396c being the most abundant families (**Supplemental Table S3.4**). The summary statistics of other types of non-coding genes including miscRNAs, ribosomal RNAs (rRNAs) and small nuclear RNAs (snRNAs) are also shown in Supplementary Table 3.4.

For Transfer RNA (tRNA) gene prediction, we excluded the predicted tRNA genes from the RFAM results and annotated them using tRNAscan-SE with default parameters(Lowe and Eddy 1997). Predictions with a cove score less than twenty were filtered out. We found 267 and 280

predicted tRNA, these numbers are lower than in Carnivora genomes (3,039 in cat genome, and 905 in dog)(Chan and Lowe 2009). It can be explained by carnivora specific SINE elements based on tRNA absent in pangolins(Vassetzky and Kramerov 2002).

**Supplemental Table S3.4. Summary statistics on non-coding RNA annotation.** No=Number of non-coding genes; bp=total number of bases of the non-coding genes.

| Type of non-coding gene |    | Malayan pangolin | Chinese pangolin |
|-------------------------|----|------------------|------------------|
| miRNA                   | No | 1069             | 1014             |
|                         | bp | 82371            | 78762            |
| miscRNA                 | No | 682              | 552              |
|                         | bp | 86278            | 73945            |
| rRNA                    | No | 68               | 64               |
|                         | bp | 37730            | 30024            |
| snRNA                   | No | 1048             | 864              |
|                         | bp | 130169           | 104188           |
| snoRNA                  | No | 460              | 424              |
|                         | bp | 47775            | 44312            |
| Total loci              |    | 313232           | 256323           |
| Total length (bp)       |    | 24186818         | 19263171         |

**Supplemental Table S3.5. Ten abundant families of miRNA in pangolins genomes.**

| Family      | Rank | #CP | Rank | #MP | Comments   |
|-------------|------|-----|------|-----|------------|
| mir-9256a-1 | 1    | 775 | 1    | 840 | TE-related |
| MIR396c     | 2    | 458 | 2    | 362 | Plants     |
| mir-8485    | 6    | 291 | 3    | 359 | Neurexins  |
| mir-9256a-2 | 7    | 238 | 4    | 297 | TE-related |



|          |    |     |    |     |         |
|----------|----|-----|----|-----|---------|
| MIR160   | 3  | 354 | 5  | 286 | Plants  |
| MIR169f  | 5  | 302 | 6  | 201 | Plants  |
| MIR6025e | 4  | 320 | 7  | 192 | Plants  |
| mir-466q | 10 | 103 | 8  | 169 | Mammals |
| MIR171d  | 14 | 45  | 9  | 105 | Plants  |
| MIR156e  | 8  | 168 | 10 | 99  | Plants  |
| MIR396e  | 9  | 114 | 11 | 81  | Plants  |

### 3.4 Segmental duplications

Segmental duplication (SD) sets for Malayan pangolin and Chinese pangolin were constructed using a modified WGAC method(Gokcumen et al. 2013). We used LAST(Kielbasa et al. 2011) to perform alignment of the draft genome against itself. Matches that lie in regions of high-copy repeats annotated by RepeatMasker were filtered. These filtered alignments were then extended using the clasp program. Subsequently, the resulting chained alignments were filtered if less than 1,000 bp. The remaining chains were globally aligned using either stretcher or needle from the European Molecular Biology Open Software Suite (EMBOSS) package(Rice et al. 2000), depending on the chain size (e.g. when the product of the sequence lengths was greater than 100 Mb stretcher was used, otherwise needle was used). Alignments of smaller than 90% identity, or a gap percentage larger than 30% were discarded.

We found a total of 21,843 duplicated fragments spanning 36.28 Mb (1.45%) in the Malayan pangolin genome and 32,992 fragments spanning 57.03 Mb (2.11%) for Chinese pangolin (Supplementary Table 3.6). The percentage of the genome coverage was calculated by assuming the genome size of Malayan pangolin and Chinese pangolin are 2.5Gb and 2.7Gb, respectively.

**Supplemental Table S3.6. Summary of segmental duplications in the pangolin genomes.** Different cut-off sizes were used to summarize detected segmental duplications in the pangolin genomes.

| SD Size | Malayan pangolin |        |                 | Chinese pangolin |        |                 |
|---------|------------------|--------|-----------------|------------------|--------|-----------------|
|         | Number           | Median | Genome Cov (Mb) | Number           | Median | Genome Cov (Mb) |
| > 1KB   | 21,843           | 1,215  | 36.28           | 32,992           | 1,477  | 57.03           |
| > 5KB   | 439              | 7,214  | 7.85            | 159              | 10,840 | 21.37           |
| > 10KB  | 135              | 29,014 | 5.78            | 88               | 15,592 | 16.65           |
| > 50KB  | 45               | 73081  | 3.78            | 0                | 0      | 0               |

#### 4.0 SPECIATION TIME AND DIVERGENCE TIME

To estimate divergence time of Pholidota from Carnivora lineage, MCMCTREE software as part of PAML4.8. package(Yang 2007) was used. Single copy gene families were used to construct a phylogenetic tree for both pangolin species and other mammalian species. Four-fold degenerate sites were extracted from the alignment of 1423 1:1 orthologs of 17 species resulting in 107,351 sites. Totally 7 reliable calibration points from the Fossil Calibration Database(Ksepka et al. 2015) were used as priors (**Supplemental Table S4.1**).

Two runs of MCMCTREE with 3,000,000 generations and 300,000 burn-in were conducted and convergence of both runs was checked using Tracer 1.5 software(Rambaut A 2014). Tree was visualised using FigTree software (**Supplemental Figure S4.1**).

**Supplemental Table S4.1. Calibration points for the divergence time estimation.**

| No. | Taxa                  | Clades                           | Minimum bound | Maximum bound | Method          | Reference                  |
|-----|-----------------------|----------------------------------|---------------|---------------|-----------------|----------------------------|
| 1   | Human - mouse         | Archonta-Glires                  | 61,5          | 100,5         | biostratigraphy | Benton and Donoghue, 2007  |
| 2   | Primates+mouse - dog, | Euarchontaglires -Laurasiatheria | 61,6          | 164,6         | fossil          | Benton et al. 2015; Fossil |

|   |                        |                                    |      |       |                 |                                                 |
|---|------------------------|------------------------------------|------|-------|-----------------|-------------------------------------------------|
|   | horse, cow             |                                    |      |       |                 | Calibration Database                            |
| 3 | Cat-dog                | Carnivora                          | 37,3 | 66    | fossil          | Benton et al. 2015; Fossil Calibration Database |
| 4 | Megabat-Microbat       | Chiroptera                         | 45   | 58,9  | fossil          | Phillips, 2015; Fossil Calibration Database     |
| 5 | Horse+rhino - pig+cow. | Common ancestor of Cetartiodactyla | 52,4 | 66    | fossil          | Benton et al. 2015; Fossil Calibration Database |
| 6 | Mouse-rat              | Mus - Rattus                       | 10,4 | 14    | biostratigraphy | Benton et al. 2015; Fossil Calibration Database |
| 7 | Hedgehog-Common shrew  | Lipotyphla                         | 61,6 | 164,6 | fossil          | Benton et al. 2015; Fossil Calibration Database |

---

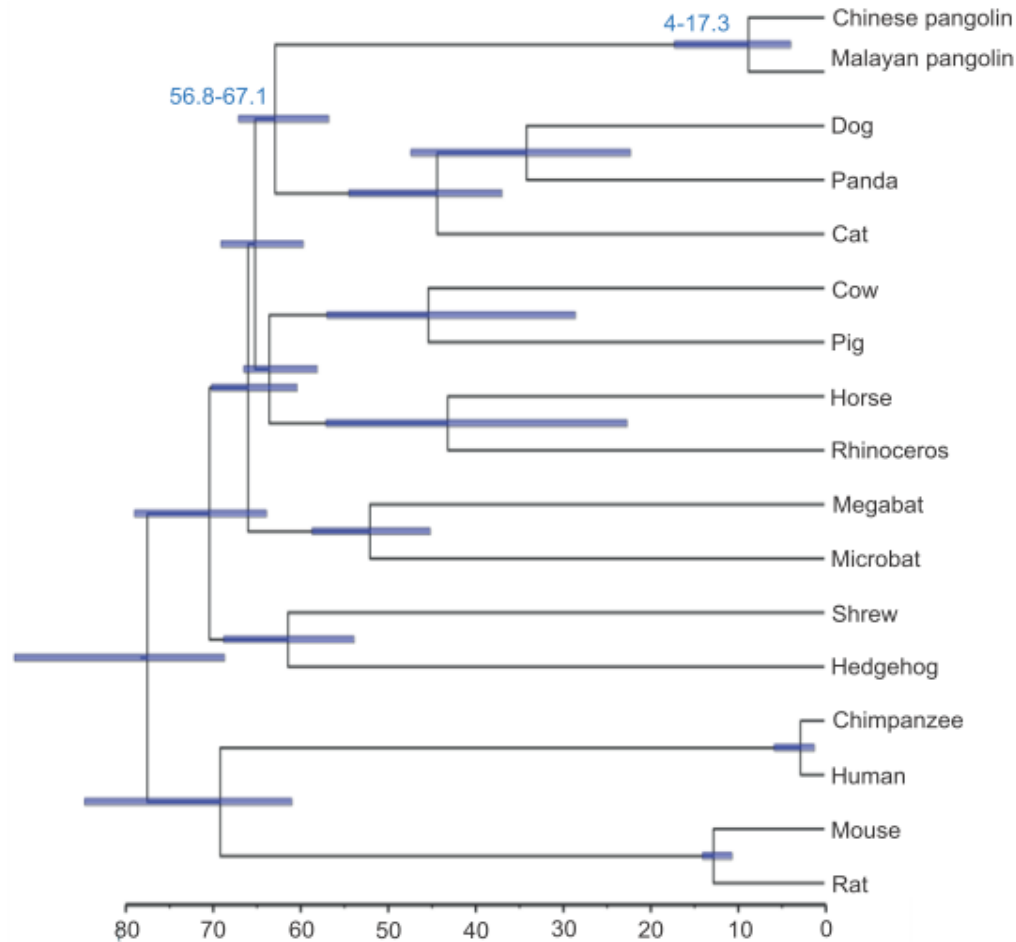

**Supplemental Figure S4.1. Estimation of speciation and divergence time.** Chronogram with 95% intervals of posterior divergence time (in millions of years) distribution of 17 mammalian species calibrated with fossil information. Posterior distributions of divergence times (blue numbers on the nodes) of Pholidota lineage and Chinese - Malayan pangolins are shown. Pangolins diverged from their closest relatives, the Carnivora, ~56.8-67.1 million years ago (MYA) (mean=61.9MYA). Malayan and Chinese pangolin species diverged from each other ~4-17.3 MYA (mean=8.84MYA). Nucleotide divergence between pangolins for 4-fold degenerate sites was 0.42 % per million years. Based on this, we calculated substitution/mutation rate,  $1.47 \times 10^{-08}$  with 95% interval ( $3.2489 \times 10^{-08}$ - $7.5118 \times 10^{-09}$  for minimum and maximum divergence time).

## 5.0 HETEROZYGOSITY

To identify Single Nucleotide Polymorphisms (SNPs) and indels in the pangolin genomes, we used the Genome Analysis Toolkit (GATK) v. 3.3.0 (McKenna et al. 2010). Read mapping was made by BowTie2 (Langmead and Salzberg 2012), and duplicated reads were removed using

Picard tools. Raw SNP calling was performed using HaplotypeCaller in the GATK software package. Apart from HaplotypeCaller, the SNVs were also identified using Samtools 1.1(Li et al. 2009). The results from HaplotypeCaller and Samtools were treated independently. The candidate variants were preprocessed based on maximum number of good quality reads of 130 and minimum mapping quality of 25. Regions of repeats were removed from resulting vcf files. The post-filtered variants were considered high quality variants and only the high quality variants that present from both pipelines were used as final list.

All variants were annotated using SnpEff 4.1 effect prediction tool and database constructed from the annotated genes of both pangolin species(Cingolani et al. 2012). For Malayan pangolin, we found 76.2%, of these variants were located outside of the protein-coding genes, 0.8% inside exons and 14.3% inside introns, and for Chinese pangolin, these numbers were 77.8%, 1.5% and 16.6%, respectively (**Supplemental Table S5.1-5.3**).

**Supplemental Table S5.1. Summary of variant calling in both pangolins.**

|                  | <b>Total number of variants</b> | <b>Effective genome size</b> | <b>Variant rate</b>   |
|------------------|---------------------------------|------------------------------|-----------------------|
| Malayan pangolin | 3,762,073                       | 2,423,229,922                | $1.55 \times 10^{-3}$ |
| Chinese pangolin | 807,706                         | 2,008,608,506                | $0.4 \times 10^{-3}$  |

**Supplemental Table S5.2. Variant effects grouped by impact.** High, Low, Moderate and Modifier effects relate to potential impact on gene function.

| <b>Variant impact</b> | <b>Malayan pangolin</b> |         | <b>Chinese pangolin</b> |         |
|-----------------------|-------------------------|---------|-------------------------|---------|
|                       | Count                   | Percent | Count                   | Percent |
| <b>High</b>           | 657                     | 0.02%   | 354                     | 0.04%   |
| <b>Low</b>            | 21,249                  | 0.53%   | 6,229                   | 0.72%   |
| <b>Moderate</b>       | 16,229                  | 0.4%    | 7,999                   | 0.92%   |
| <b>Modifier</b>       | 3,999,556               | 99.06%  | 851,869                 | 98.32%  |

**Supplemental Table S5.3. Variant effect grouped by regions.**

| Variant region       | Malayan pangolin |         | Chinese pangolin |         |
|----------------------|------------------|---------|------------------|---------|
|                      | Count            | Percent | Count            | Percent |
| Downstream           | 160,033          | 3.96%   | 37,144           | 4.29%   |
| Exon                 | 33,823           | 0.84%   | 13,483           | 1.56%   |
| Intergenic           | 3,077,204        | 76.22%  | 674,720          | 77.87%  |
| Intron               | 578,977          | 14.34%  | 100,657          | 11.62%  |
| Splice site acceptor | 108              | 0.003%  | 45               | 0.005%  |
| Splice site donor    | 169              | 0.004%  | 69               | 0.008%  |
| Splice site region   | 2,986            | 0.07%   | 761              | 0.08%   |
| Upstream             | 155,706          | 3.85%   | 34,611           | 3.99%   |

## 6.0 PANGOLIN POPULATION HISTORY ESTIMATION

Utilizing the Pairwise Sequential Markovian Coalescent (PSMC) model, we inferred the historical effective population size ( $N_e$ ) over time for both the pangolin genomes (**Supplemental Figure S6.1**). In order to scale  $N_e$ , we used generation time,  $g$  of 7 years and per site per generation mutation rate of  $1.4 \times 10^{-8}$  calculated based on neutral theory as per computed phylogenetic tree and divergence time in Supplementary Figure 4.1. The ancestral Chinese pangolin coalesced at least around 1 to 2 million years ago (MYA) and showed inverted population size trends to Malayan pangolin until 100 thousand years ago (KYA) after which there was a dramatic decline in both the species. The Marine Isotopic Stage 11 (420-360 KYA) is known as one of the warmest interglacial event in the past 500 KYA, and pangolin  $N_e$  were approaching the maxima and minima for Malayan pangolin and Chinese pangolin, respectively during this period in Middle Pleistocene (728-126 KYA). The paleoclimatic events during Middle Pleistocene particularly warming and sea-level rising above current levels could have provided better genetic fitness for Malayan pangolin and thus we observed the rise in their population size compared to Chinese pangolin. It is also interesting to note that the decline in

pangolin  $N_e$  from 100 KYA to 10 KYA coincides with the Late Pleistocene extinction events of other land mammals in other parts of the world(Martin 1989).

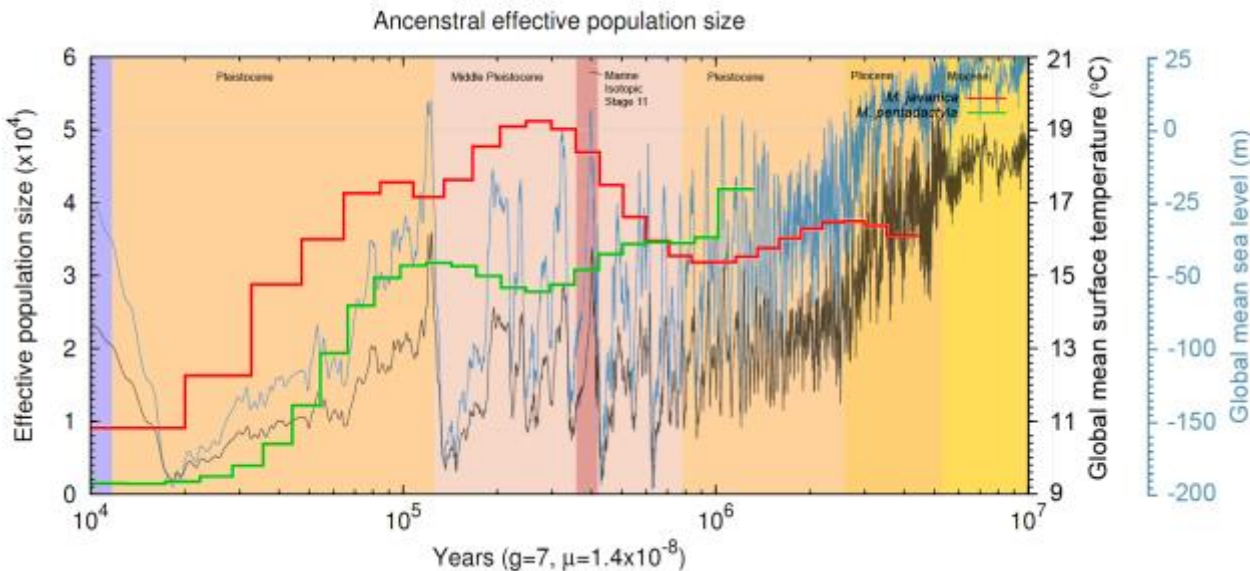

**Supplemental Figure S6.1. Estimated population size history for both Malayan and Chinese pangolins.** The X-axis represents time in years. The first y-axis on the left shows the effective population size scaled to  $4\mu N$ . On the right, the two colour coded y-axis shows the global mean surface temperature (black) and sea-level data (blue). The global mean sea level is expressed in relation to current sea-level. The paleoclimatic data was obtained from a previous study by Hansen and co-workers (2013).

## 7.0 VALIDATION OF PSEUDOGENIZED GENES

To validate mutations found in pseudogenized genes, we examined the mutated regions of these genes using PCR and Sanger sequencing. For each gene, we performed the Sanger sequencing using DNA extracted from seven unrelated adult Malayan pangolins and one fetus from one of the adult pangolins that we used in this validation. Primer sequences used in the validation are shown in **Supplemental Table S7.1**. Two sets of primers were used to examine two different mutated regions in the *ENAM* gene. The first primer pair (5'-AGCAAGTTCAAAGGGTTTCTCAGC-3' and 3'-TTCAGCTTGTTTCATCAGAATTTGG-5') and second primer pair (5'-CCTTATTTTCAGTAACTCCCAAGCT-3' and 3'-CTTGCAATTCTTAGTCTGGGTATCTT-5') were used to validate the frameshift mutation and premature stop codon found in the *ENAM* gene. *FBFSP2* amplified with forward primer (5'-GAGTGCCCAGAGTCTATGTAGGGATGG-3') and reverse primer (3'-

TTCCTGCTCATCGTCCTTCCCAGAG-5') targeting 437bps of the mutation site. While *GUCA1C* was amplified with forward primer (5'-CAGCTGTAAGAGATTGAGTAGC-3') and reverse primer (3'-GTTTAATGACTCACTTACCTACAAGC-5') targeting 476bps of the mutation site. The *IFNE* gene was amplified using forward primer (5'-GAGGAAATGTCCCATGAACACTAGG-3') and reverse primer (5'-AGTTCTCTCTCCCATCCACCTACCC-3'). All the primers were used for PCR using the following described protocol. The total reaction volume of 25 µL contained 60ng purified gDNA, 0.3 pmol of each primer, deoxynucleotides triphosphates (dNTP, 400 µM each), 0.5 U Taq DNA polymerase and supplied buffer were used. The PCR was performed as follow: 1 cycle (94 °C for 2 minutes) for initial denaturation; 30 cycles (98 °C for 10 sec; 65 °C for 30 sec; 68 °C for 30 sec) for annealing and extension for DNA amplification. The PCR products were purified by standard methods and directly sequenced with the same primers using BigDye® Terminator v3.1 Cycle Sequencing Kit (Applied Biosystems).

For the Sanger validation of the genes in African species, we only can use the same sets of primers designed based on the genome of Malayan pangolin since we do not have the genome sequences of African species. Therefore, experimental validation did not work for some genes or genomic regions due to the differences between the sequences of Asian and African species. However, we only showed the results for the successfully validated genes and genomic regions in this section.

**Supplemental Table S7.1. Primer sequences used for the validation of gene mutations.** The mutations were validated using Sanger sequencing.

| Gene          | Primers                                                               | Primer Length (bp) | Annealing Temperature |
|---------------|-----------------------------------------------------------------------|--------------------|-----------------------|
| <i>ENAM_1</i> | 5'-AGCAAGTTCAAAGGGTTTCTCAGC-3'<br>3'-TTCAGCTTGTTTCATCAGAATTTGG-5'     | 464                | 62 °C                 |
| <i>ENAM_2</i> | 5'- CCTTATTTTCAGTAACCTCCCAAGCT-3'<br>3'-CTTGCAATTCTTAGTCTGGGTATCTT-5' | 348                | 62 °C                 |
| <i>AMELX</i>  | 5' CAAAGAAAGCATTGCTACTTCTCC 3'<br>3'-GGGTCTAGAGTTTCAGTAACCAGAG-5'     | 552                | 62 °C                 |
| <i>AMBN</i>   | 5'-GTCTCTCACTTTGTTACGGTTTCT-3'<br>3'-CAAGTGTTTGGAATAATATAGGTCCC-5'    | 792                | 62 °C                 |
| <i>BFSP2</i>  | 5'-GAGTGCCCAGAGTCTATGTAGGGATGG-3'                                     | 437                | 68 °C                 |



496497

498

499

502

503

504

505

| <b>GUCA1C</b>                 | 20         | 140       | 160        | 165      |
|-------------------------------|------------|-----------|------------|----------|
|                               | .... ...   | ... ....  | .... ....  | .... ... |
| <i>Homo sapiens</i>           | TCTAT AGC  | TGCA AGGT | CAGAAGGCCA | ATAAACA  |
| <i>Canis familiaris</i>       | TCCAG AGC  | TGCA GGGT | CCAAAAGCCA | ATCAACA  |
| <i>Felis catus</i>            | TCCAT AGC  | TGCA AGGT | CAAAAAGCCA | ATCAACA  |
| <i>Manis temminckii</i> (5)   | T----- AGC | TGTA AAGT | TAAAAGGTCA | ATTAAATA |
| <i>Manis tricuspis</i> (5)    | T----- AGC | TGTA AAGT | TAAAAGGTCA | ATTAAATA |
| <i>Manis tetradactyla</i> (5) | T----- AGC | TGTA AAGT | TAAAAGGTCA | ATTAAATA |
| <i>Manis gigantea</i> (1)     | T----- AGC | TGTA AAGT | TAAAAGGTCA | ATTAAATA |
| <i>Manis javanica</i>         | T----- AGC | TGTA AAGT | TAAAAGGCCA | ATTAAATA |
| <i>Manis pentadactyla</i>     | T----- AGC | TGTA AAGT | TAAAAGGCCA | ATTAAATA |

Supplemental Figure S7.3. Sanger validation of *GUCA1C* genes in African pangolin species. The numbers in the brackets indicated the number of samples we examined.

| <b>IFNE</b>                   | 190                    | 220                   | 240                   | 270        |
|-------------------------------|------------------------|-----------------------|-----------------------|------------|
|                               | .... ....              | .... ....             | .... ....             | .... ....  |
| <i>Homo sapiens</i>           | TTTCTGCTTC CTCAGAAG--  | -----T CTTTGAGTCC     | TCAGCAGTAC            | CATTCTCCAT |
| <i>Felis catus</i>            | TTCTGTGCTTC CCCAGCGG-- | -----T CTGTGAATCC     | TCGCCAGTAC            | CATTCTTCAC |
| <i>Canis familiaris</i>       | TTCTGTGCTTC CCCAGCAG-- | -----T CTGTGAATCG     | TCACCAGTAC            | CATTCTTCAT |
| <i>Manis temminckii</i> (5)   | TTCTACTTC CCCACAGTA    | CCAGAATCCT CCTGAATCTT | TCCTGAATCC TCGCTAGTAC | CAT-CTTCCT |
| <i>Manis tricuspis</i> (4)    | TTCTACTTC CCCACAGTA    | CCAGAATCCT CCTGAATCTT | TCCTGAATCC TCGCTAGTAC | CAT-CTTCCT |
| <i>Manis tetradactyla</i> (2) | TTCTACTTC CCCACAGTA    | CCAGAATCCT CCTGAATCTT | TCCTGAATCC TCGCTAGTAC | CAT-CTTCCT |
| <i>Manis gigantea</i> (1)     | TTCTGTGCTTC CCCACAGTA  | CCAGAATCCT CCTGAATCTT | TCCTGAATCC TTGCTAGTAC | CAT-CTTCCT |
| <i>Manis javanica</i>         | TTCTGTGCTTC CCCACCAATA | CCAGGATCCT CCTGTATCTT | TCCTGAATCC TCACTAGTAC | CAT-CTTCTT |
| <i>Manis pentadactyla</i>     | TTCTGTGCTTC GCCACCAATA | CCAGGATCCT CCTGTATCTT | TCCTGAATCC TCACTAGTAC | CAT-CTTCTT |

  

|                               | 65         | 75         | 85        |
|-------------------------------|------------|------------|-----------|
|                               | .... ....  | .... ....  | .... .... |
| <i>Homo sapiens</i>           | FLLPQK---- | ---SLSPQQY | QKGHTLA   |
| <i>Felis catus</i>            | FLLPQR---- | ---SVNPRQY | QKGQALA   |
| <i>Canis familiaris</i>       | FLLPQQ---- | ---SVNRHQY | QKGQALA   |
| <i>Manis temminckii</i> (5)   | FLLPHQYQNP | PESFLNPR*Y | QKRHTIT   |
| <i>Manis tricuspis</i> (4)    | FLLPHQYQNP | PESFLNPR*Y | QKRHTIT   |
| <i>Manis tetradactyla</i> (2) | FLLPHQYQNP | PESFLNPR*Y | QKRHTIT   |
| <i>Manis gigantea</i> (1)     | FLLPHQYQNP | PESFLNPC*Y | QKRHTIT   |
| <i>Manis javanica</i>         | FLLPHQYQDP | PVSFLNPH*Y | QKGHTIT   |
| <i>Manis pentadactyla</i>     | FLLRHQYQDP | PVSFLNPH*Y | QKGHTIT   |

Supplemental Figure S7.4. Sanger validation of *IFNE* genes in African pangolin species. (Top) *IFNE* nucleotide sequences. (Bottom) *IFNE* protein sequences. The numbers in the brackets indicated the number of samples we examined.

|                               | KRT36         | KRT75                     |
|-------------------------------|---------------|---------------------------|
| <i>Homo sapiens</i>           | LNV SSSEQLQCC | DVDAAYMNKVELEAKVKSLPEEINF |
| <i>Manis temminckii</i> (4)   | LNV MSSEQLQSD | DTDAAY-NKVE-----SLTYEINF  |
| <i>Manis tetradactyla</i> (2) | LNV MSSEQLQSY | DADSAYVNKVELESRVNSLTDEINF |
| <i>Manis tricuspis</i> (1)    | LNV MSSEQLQSY | DADSAYVNKVELESRVNSLTDEINF |
| <i>Manis javanica</i>         | LSV MSSEQLQSY | DADAAYVDKVELESRVNSLTDEINF |
| <i>Manis pentadactyla</i>     | LSV MSSEQLQSY | DADAAYVNKVELESRVNSLTDEINF |

**Supplemental Figure S7.5. The keratin-related proteins in African pangolin species.** (Left) KRT36 protein sequence alignment. At least two critical amino acid changes that we observed in the Malayan and Chinese pangolins were identical in three African species that we examined. In *M. temminckii*, the C->D amino acid change likely affect the biological function of KRT36 (score=-8.461) as predicted by PROVEAN (Choi and Chan 2015). (Right) Two critical amino acid changes that we observed in the Malayan and Chinese pangolins were identical in *M. tricuspis* and *M. temminckii*, but not *M. tetradactyla*. In *M. tetradactyla*, the changes of V->T and M->deletion are also likely to affect the function of KRT75 as predicted by PROVEAN with scores of -3.459 and -12.790, respectively. No data available for *M. gigantea*.

## 8.0 GENE FAMILY EXPANSION AND CONTRACTION ANALYSIS

Correct assignment of genes to families is highly important for this analysis. Firstly we performed test for 40 mammalian species present in TreeFam database(Li et al. 2006). Proteins of this species assigned to families annotated in TreeFam database were extracted and mapped to hmm profiles of known families present in this database (<http://www.treefam.org/static/download/treefam9.hmm3.tar.gz>) by HMMER3 (hmmsearch with default parameters)(Johnson et al. 2010). Each protein was assigned to top-hit family if it was significant. Surprisingly, twenty-one proteins were not mapped to any family, and six more proteins showed only not significant hits. 8,885 of 10,306 (86.2%) families were correctly assembled for all species, and 9,213 (89.4%) families were assembled with errors in less than 5% species. This set of families was used in following expansion/contraction analysis. Assignment pangolin genes to families was performed in the same manner. Expansion and contraction analysis of gene families was performed by CAFE v3.1(De Bie et al. 2006). Eight reference species were used: *Ailuropoda melanoleuca* (giant panda), *Bos taurus* (cow), *Canis familiaris* (dog), *Equus caballus* (horse), *Felis catus* (cat), *Homo sapiens* (human), *Mus musculus* (mouse), *Pteropus vampyrus* (megabat). One of CAFE assumptions is that MRCA of all analyzed species had at least one protein in each family. Because of this reason we removed families present in less than 3 species, therefore 8,438 families were retained in final dataset.

GO term enrichment analysis of all significantly 147 expanded gene families in pangolins was performed using Blast2GO (**Supplemental Figure S8.3**)(Conesa et al. 2005). Among the significantly enriched GO terms are translation (174 genes;GO:0006412;FDR p-value=1.13x10<sup>-</sup>

<sup>60)</sup> and ribosome biogenesis (38 genes;GO:0042254;FDR p-value=1.02x10<sup>-10</sup>). The significant expansion of ribosome-associated gene families may be an advantageous selection for global up-regulation of protein synthesis.

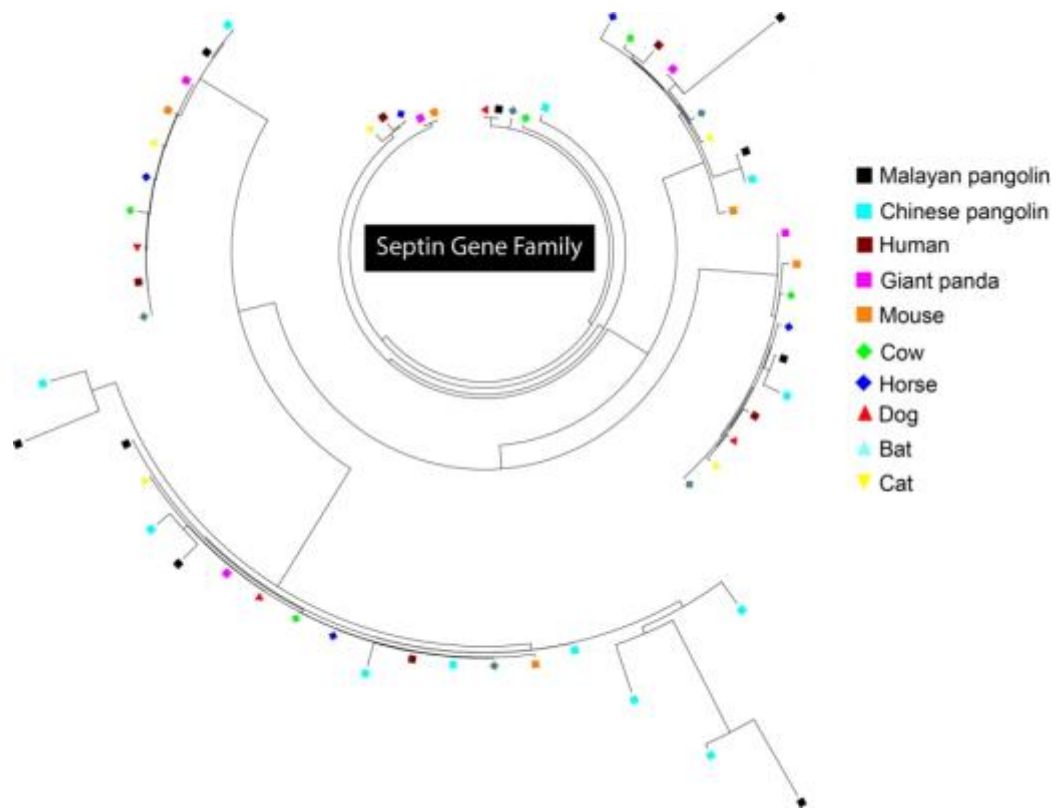

**Supplemental Figure S8.1. Expansion of the Septin gene family in the pangolin lineage.** Septin was expanded in the Malayan pangolin (9 genes; black square) and Chinese pangolin (12 genes; light blue square).



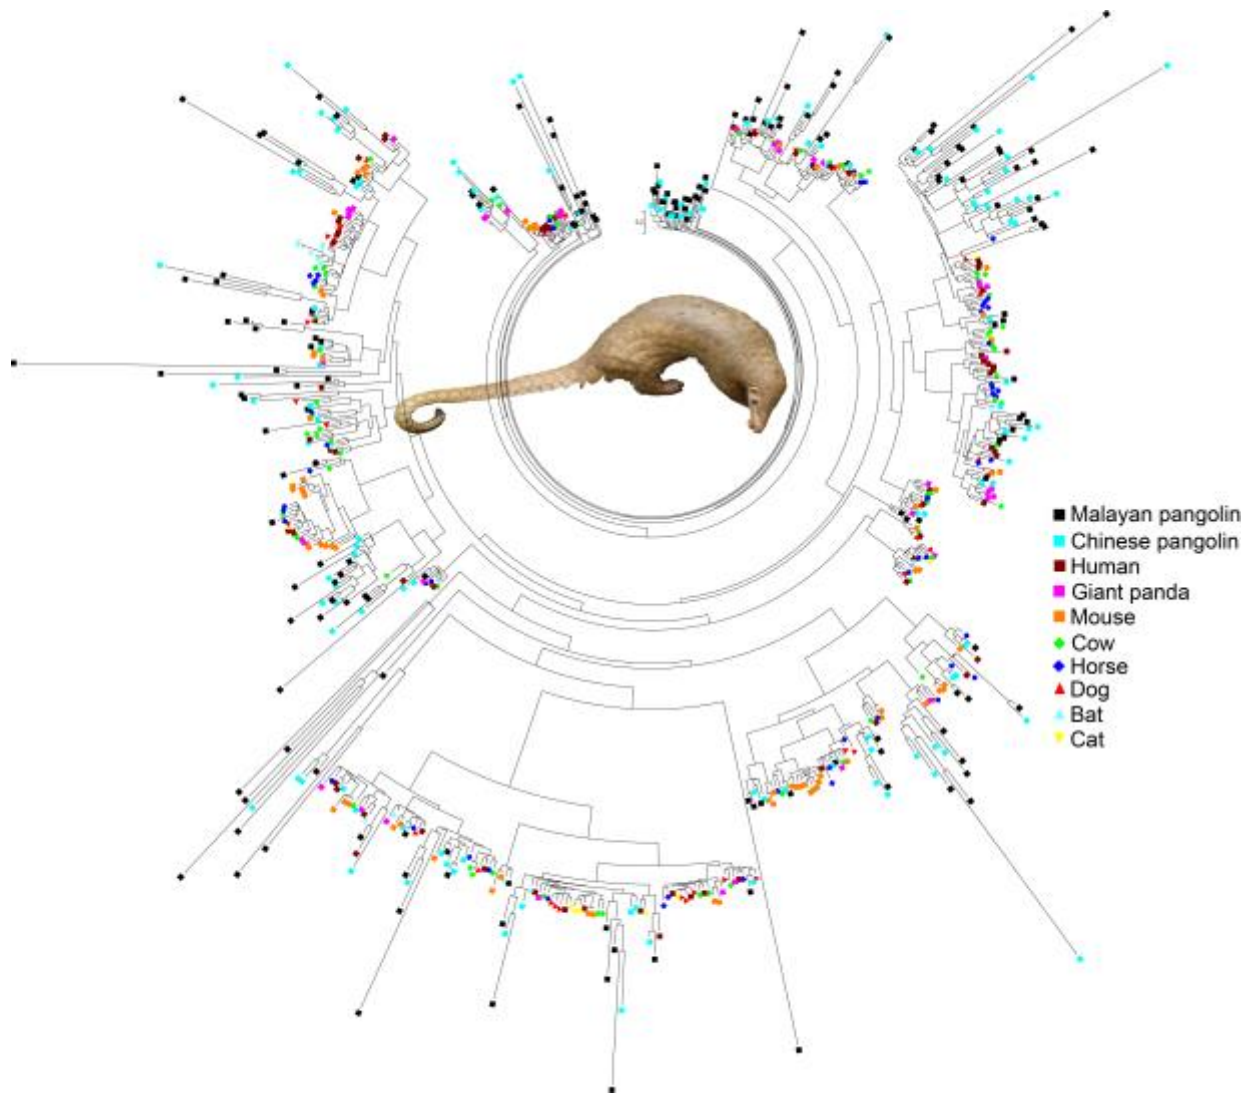

**Supplemental Figure S8.2. Expansion of the olfactory gene (OR) gene family 2 in the pangolin lineage.** The protein sequences of OR family 2 used in this analysis were derived from expanded orthologous gene families in the pangolin lineage. The OR genes in the Malayan pangolin and Chinese pangolin are represented by black square and light blue square, respectively. The olfactory receptor genes in both pangolin species were significantly expanded compared to other mammalian species including human, giant panda and mouse.

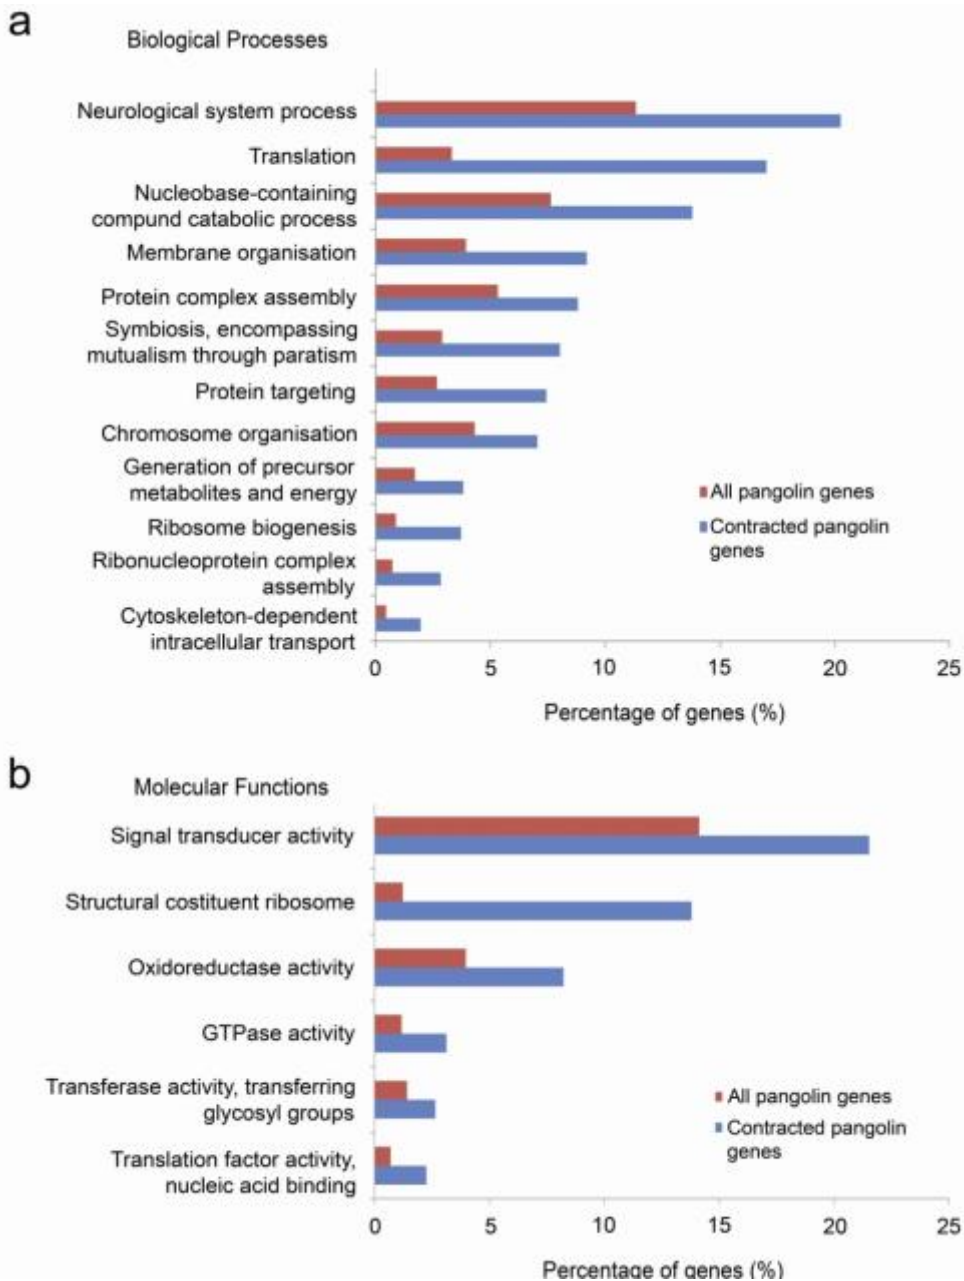

**Supplemental Figure S8.3. Functional enrichment of 147 significantly expanded gene families.** Only Gene Ontology (GO) terms with a significant enrichment (Fisher Exact Test; FDR p-value<0.05) are shown. (a) Significantly over-represented biological processes. (b) Significantly over-represented molecular functions.

## 9.0 POSITIVE SELECTION ANALYSIS

To find the signatures of positive selection in the pangolin lineage, we used 10 mammal species: horse, dog, cat, panda, cow, mouse, human, megabat and the two pangolin species. In total, we

found 8,498 1:1 orthologs between the species using Poff/proteinortho tool (Lechner et al. 2014). Orthologs were aligned using Prank F+ codon model and filtered out using Gblocks software (Castresana 2000). The final set consisted of 8,250 genes. Codeml software as part of PAML 4.8 package (Yang 2007) was used to test branch-site model of positive selection for pangolin lineage. Totally 8250 1:1 orthologs were tested. For each ortholog alignment codon model of molecular evolution was fitted with pangolin lineage as foreground branch and other lineages as background branches. Null model of neutral evolution of foreground branch with fixed omega = 1 (model =2, NSsites=2) was tested using Likelihood-Ratio test (with p < 0.05 significance level) against alternative model with estimated omega value (model =2, NSsites=2). There are 427 genes identified under positive selection in the pangolin lineage (Supplementary Table 9.1).

**Supplemental Table S9.1. List of genes under positive selection.** Totally 427 genes with raw p-values <0.05 according to standard Likelihood Ratio Tests.

| ENSEMBL<br>transcript<br>ID | Chinese<br>pangolin<br>gene ID | Malayan<br>pangolin<br>gene ID | Gene<br>symbol | Description                                           | p-value  |
|-----------------------------|--------------------------------|--------------------------------|----------------|-------------------------------------------------------|----------|
| ENST00000612742             | MCP0013542                     | MMP0007444                     | <i>METTL8</i>  | methyltransferase like 8                              | 4.53E-19 |
| ENST00000396625             | MCP0014112                     | MMP0015713                     | <i>COL4A4</i>  | collagen, type IV, alpha 4                            | 8.76E-19 |
| ENST00000424952             | MCP0014989                     | MMP0001974                     | <i>ZDHHC3</i>  | zinc finger, DHH C-type containing 3                  | 5.96E-11 |
| ENST00000620295             | MCP0011698                     | MMP0006416                     | <i>KIF1B</i>   | kinesin family member 1B                              | 1.58E-10 |
| ENST00000404158             | MCP0013765                     | MMP0006992                     | <i>GATAD2A</i> | GATA zinc finger domain containing 2A                 | 2.43E-10 |
| ENST00000262134             | MCP0002597                     | MMP0013384                     | <i>LPCAT2</i>  | lysophosphatidylcholine acyltransferase 2             | 6.84E-10 |
| ENST00000438552             | MCP0013319                     | MMP0005369                     | <i>SNRPB</i>   | small nuclear ribonucleoprotein polypeptides B and B1 | 8.28E-10 |
| ENST00000319327             | MCP0005590                     | MMP0004890                     | <i>SERINC4</i> | serine incorporator 4                                 | 9.61E-09 |
| ENST00000465301             | MCP0003852                     | MMP0011385                     | <i>RGAG1</i>   | retrotransposon gag domain containing 1               | 2.11E-07 |
| ENST00000256997             | MCP0003917                     | MMP0002374                     | <i>ACP2</i>    | acid phosphatase 2, lysosomal                         | 4.65E-07 |
| ENST00000170150             | MCP0006225                     | MMP0004578                     | <i>BPIFB2</i>  | BPI fold containing family B, member 2                | 5.64E-07 |
| ENST00000262288             | MCP0018898                     | MMP0015215                     | <i>SCPEP1</i>  | serine carboxypeptidase 1                             | 6.44E-07 |
| ENST00000399518             | MCP0004479                     | MMP0016031                     | <i>PLA2G4E</i> | phospholipase A2, group IVE                           | 8.73E-07 |
| ENST00000417439             | MCP0006067                     | MMP0003610                     | <i>LTF</i>     | lactotransferrin                                      | 1.80E-06 |
| ENST00000220812             | MCP0008149                     | MMP0010347                     | <i>DKK4</i>    | dickkopf WNT signaling pathway inhibitor 4            | 2.16E-06 |
| ENST00000311772             | MCP0015226                     | MMP0017399                     | <i>PPP1R8</i>  | protein phosphatase 1, regulatory subunit             | 2.67E-06 |

|                 |            |            |                 |                                                                              |          |
|-----------------|------------|------------|-----------------|------------------------------------------------------------------------------|----------|
| ENST00000556816 | MCP0000554 | MMP0002391 | <i>ISCA2</i>    | iron-sulfur cluster assembly 2                                               | 4.03E-06 |
| ENST00000297268 | MCP0005262 | MMP0004567 | <i>COL1A2</i>   | collagen, type I, alpha 2                                                    | 7.80E-06 |
| ENST00000218867 | MCP0010675 | MMP0004325 | <i>SGCG</i>     | sarcoglycan, gamma (35kDa dystrophin-associated glycoprotein)                | 7.88E-06 |
| ENST00000350051 | MCP0008180 | MMP0019042 | <i>BIRC5</i>    | baculoviral IAP repeat containing 5                                          | 1.14E-05 |
| ENST00000307921 | MCP0013631 | MMP0009333 | <i>ADAT1</i>    | adenosine deaminase, tRNA-specific 1                                         | 1.25E-05 |
| ENST00000252245 | MCP0002974 | MMP0022581 | <i>KRT75</i>    | keratin 75, type II                                                          | 1.33E-05 |
| ENST00000039989 | MCP0006888 | MMP0011614 | <i>TTC17</i>    | tetratricopeptide repeat domain 17                                           | 1.50E-05 |
| ENST00000399080 | MCP0016897 | MMP0011951 | <i>RAD51AP2</i> | RAD51 associated protein 2                                                   | 1.62E-05 |
| ENST00000372754 | MCP0009233 | MMP0007886 | <i>MATN4</i>    | matrilin 4                                                                   | 1.93E-05 |
| ENST00000435159 | MCP0011655 | MMP0001856 | <i>TMEM132</i>  | transmembrane protein 132C                                                   | 2.75E-05 |
| <i>C</i>        |            |            |                 |                                                                              |          |
| ENST00000430500 | MCP0007111 | MMP0011114 | <i>SLC22A8</i>  | solute carrier family 22 (organic anion transporter), member 8               | 2.82E-05 |
| ENST00000330794 | MCP0003498 | MMP0002794 | <i>TMEM173</i>  | transmembrane protein 173                                                    | 2.92E-05 |
| ENST00000302555 | MCP0003040 | MMP0003207 | <i>GP2</i>      | glycoprotein 2 (zymogen granule membrane)                                    | 3.36E-05 |
| ENST00000230568 | MCP0016099 | MMP0019937 | <i>LY86</i>     | lymphocyte antigen 86                                                        | 3.48E-05 |
| ENST00000229243 | MCP0001799 | MMP0002450 | <i>ACRBP</i>    | acrosin binding protein                                                      | 4.09E-05 |
| ENST00000318602 | MCP0015520 | MMP0022433 | <i>A2M</i>      | alpha-2-macroglobulin                                                        | 4.39E-05 |
| ENST00000355661 | MCP0002865 | MMP0018609 | <i>PLEKHA7</i>  | pleckstrin homology domain containing, family A member 7                     | 4.65E-05 |
| ENST00000217169 | MCP0011196 | MMP0023102 | <i>BIRC7</i>    | baculoviral IAP repeat containing 7                                          | 4.77E-05 |
| ENST00000398189 | MCP0011417 | MMP0007405 | <i>APOF</i>     | apolipoprotein F                                                             | 4.90E-05 |
| ENST00000367843 | MCP0012903 | MMP0002856 | <i>DCAF6</i>    | DDB1 and CUL4 associated factor 6                                            | 5.00E-05 |
| ENST00000407315 | MCP0003536 | MMP0017719 | <i>THAP4</i>    | THAP domain containing 4                                                     | 5.27E-05 |
| ENST00000527372 | MCP0019410 | MMP0019410 | <i>MYO18A</i>   | myosin XVIIIa                                                                | 6.33E-05 |
| ENST00000305949 | MCP0004057 | MMP0021541 | <i>MTBP</i>     | MDM2 binding protein                                                         | 6.84E-05 |
| ENST00000621805 | MCP0006948 | MMP0015704 | <i>RAB18</i>    | RAB18, member RAS oncogene family                                            | 7.88E-05 |
| ENST00000265081 | MCP0014405 | MMP0008354 | <i>MSH3</i>     | mutS homolog 3                                                               | 9.12E-05 |
| ENST00000377122 | MCP0012659 | MMP0012306 | <i>NEBL</i>     | nebulin                                                                      | 0.0001   |
| ENST00000298694 | MCP0010292 | MMP0010258 | <i>ARHGEF4</i>  | Rho guanine nucleotide exchange factor (GEF) 40                              | 0.0001   |
| <i>O</i>        |            |            |                 |                                                                              |          |
| ENST00000286428 | MCP0002071 | MMP0019114 | <i>VBPI</i>     | von Hippel-Lindau binding protein 1                                          | 0.0001   |
| ENST00000367975 | MCP0011264 | MMP0021735 | <i>SDHC</i>     | succinate dehydrogenase complex, subunit C, integral membrane protein, 15kDa | 0.0001   |
| ENST00000260810 | MCP0016712 | MMP0022386 | <i>TOPBP1</i>   | topoisomerase (DNA) II binding protein 1                                     | 0.0001   |
| ENST00000306058 | MCP0016146 | MMP0001730 | <i>ASXL1</i>    | additional sex combs like transcriptional                                    | 0.0001   |



|                 |            |            |                  |                                                                      |        |
|-----------------|------------|------------|------------------|----------------------------------------------------------------------|--------|
|                 |            |            |                  | regulator 1                                                          |        |
| ENST00000394518 | MCP0006774 | MMP0016921 | <i>AKAP13</i>    | A kinase (PRKA) anchor protein 13                                    | 0.0002 |
| ENST00000394931 | MCP0015501 | MMP0006535 | <i>BMPR1B</i>    | bone morphogenetic protein receptor, type IB                         | 0.0002 |
| ENST00000598162 | MCP0018058 | MMP0004019 | <i>BCAT2</i>     | branched chain amino-acid transaminase 2, mitochondrial              | 0.0002 |
| ENST00000535274 | MCP0012621 | MMP0021425 | <i>B3GNT4</i>    | UDP-GlcNAc:betaGal beta-1,3-N-acetylglucosaminyltransferase 4        | 0.0002 |
| ENST00000380010 | MCP0012645 | MMP0004724 | <i>SLC19A1</i>   | solute carrier family 19 (folate transporter), member 1              | 0.0002 |
| ENST00000389758 | MCP0017570 | MMP0014493 | <i>MROH2A</i>    | maestro heat-like repeat family member 2A                            | 0.0002 |
| ENST00000360351 | MCP0018405 | MMP0012150 | <i>MAP2</i>      | microtubule-associated protein 2                                     | 0.0002 |
| ENST00000332578 | MCP0008778 | MMP0014322 | <i>TMPRSS9</i>   | transmembrane protease, serine 9                                     | 0.0002 |
| ENST00000261652 | MCP0001724 | MMP0007814 | <i>TNFRSF13B</i> | tumor necrosis factor receptor superfamily, member 13B               | 0.0002 |
| ENST00000532211 | MCP0002130 | MMP0006949 | <i>PIH1D2</i>    | PIH1 domain containing 2                                             | 0.0003 |
| ENST00000493960 | MCP0006786 | MMP0016372 | <i>FAM208A</i>   | family with sequence similarity 208, member A                        | 0.0003 |
| ENST00000265992 | MCP0019338 | MMP0001436 | <i>CCNJ</i>      | cyclin J                                                             | 0.0003 |
| ENST00000400897 | MCP0009359 | MMP0017922 | <i>MASP2</i>     | mannan-binding lectin serine peptidase 2                             | 0.0003 |
| ENST00000371253 | MCP0001163 | MMP0015162 | <i>ADGRF1</i>    | adhesion G protein-coupled receptor F1                               | 0.0004 |
| ENST00000404938 | MCP0020085 | MMP0019810 | <i>ABCB5</i>     | ATP-binding cassette, sub-family B (MDR/TAP), member 5               | 0.0005 |
| ENST00000361373 | MCP0019329 | MMP0001401 | <i>LDB3</i>      | LIM domain binding 3                                                 | 0.0005 |
| ENST00000338005 | MCP0000142 | MMP0008507 | <i>CCDC183</i>   | coiled-coil domain containing 183                                    | 0.0005 |
| ENST00000390683 | MCP0006516 | MMP0006681 | <i>RAD51B</i>    | RAD51 paralog B                                                      | 0.0005 |
| ENST00000370378 | MCP0007955 | MMP0008286 | <i>KIAA1107</i>  | KIAA1107                                                             | 0.0005 |
| ENST00000222286 | MCP0001801 | MMP0002446 | <i>GAPDHS</i>    | glyceraldehyde-3-phosphate dehydrogenase, spermatogenic              | 0.0006 |
| ENST00000295500 | MCP0018223 | MMP0014289 | <i>GPR155</i>    | G protein-coupled receptor 155                                       | 0.0006 |
| ENST00000357590 | MCP0018531 | MMP0009444 | <i>SLC37A4</i>   | solute carrier family 37 (glucose-6-phosphate transporter), member 4 | 0.0006 |
| ENST00000270115 | MCP0012832 | MMP0023303 | <i>LRRC56</i>    | leucine rich repeat containing 56                                    | 0.0007 |
| ENST00000436874 | MCP0004214 | MMP0002213 | <i>VEZT</i>      | vezatin, adherens junctions transmembrane protein                    | 0.0007 |
| ENST00000353364 | MCP0018742 | MMP0014729 | <i>USP15</i>     | ubiquitin specific peptidase 15                                      | 0.0007 |
| ENST00000486257 | MCP0011128 | MMP0017391 | <i>TIGIT</i>     | T cell immunoreceptor with Ig and ITIM domains                       | 0.0007 |
| ENST00000371421 | MCP0011485 | MMP0018057 | <i>ARRDC1</i>    | arrestin domain containing 1                                         | 0.0008 |

|                 |            |            |                 |                                                                    |        |
|-----------------|------------|------------|-----------------|--------------------------------------------------------------------|--------|
| ENST00000374075 | MCP0008783 | MMP0003826 | <i>AKNA</i>     | AT-hook transcription factor                                       | 0.0008 |
| ENST00000381527 | MCP0000833 | MMP0021053 | <i>CDK8</i>     | cyclin-dependent kinase 8                                          | 0.0008 |
| ENST00000529629 | MCP0017036 | MMP0011201 | <i>CAPN5</i>    | calpain 5                                                          | 0.0008 |
| ENST00000301391 | MCP0015374 | MMP0013367 | <i>CYB5D2</i>   | cytochrome b5 domain containing 2                                  | 0.0009 |
| ENST00000325888 | MCP0015344 | MMP0001388 | <i>FLNC</i>     | filamin C, gamma                                                   | 0.0010 |
| ENST00000346736 | MCP0004001 | MMP0016910 | <i>C19orf57</i> | chromosome 19 open reading frame 57                                | 0.0010 |
| ENST00000302787 | MCP0003872 | MMP0005668 | <i>LETM1</i>    | leucine zipper-EF-hand containing<br>transmembrane protein 1       | 0.0010 |
| ENST00000360299 | MCP0013647 | MMP0008458 | <i>RAB5B</i>    | RAB5B, member RAS oncogene family                                  | 0.0010 |
| ENST00000311601 | MCP0018930 | MMP0009659 | <i>SH3PXD2B</i> | SH3 and PX domains 2B                                              | 0.0010 |
| ENST00000414749 | MCP0010652 | MMP0012397 | <i>MLXIPL</i>   | MLX interacting protein-like                                       | 0.0010 |
| ENST00000427836 | MCP0007865 | MMP0007255 | <i>PLEKHM3</i>  | pleckstrin homology domain containing,<br>family M, member 3       | 0.0011 |
| ENST00000314583 | MCP0001012 | MMP0006283 | <i>HCLS1</i>    | hematopoietic cell-specific Lyn substrate<br>1                     | 0.0012 |
| ENST00000251643 | MCP0012401 | MMP0022286 | <i>KRT12</i>    | keratin 12, type I                                                 | 0.0012 |
| ENST00000261847 | MCP0000241 | MMP0014830 | <i>SECISBP2</i> | SECIS binding protein 2-like                                       | 0.0012 |
|                 |            |            | <i>L</i>        |                                                                    |        |
| ENST00000373095 | MCP0001404 | MMP0017002 | <i>FAM102A</i>  | family with sequence similarity 102,<br>member A                   | 0.0012 |
| ENST00000257974 | MCP0013193 | MMP0017552 | <i>KRT82</i>    | keratin 82, type II                                                | 0.0012 |
| ENST00000250018 | MCP0010835 | MMP0010087 | <i>TPH1</i>     | tryptophan hydroxylase 1                                           | 0.0013 |
| ENST00000483725 | MCP0006513 | MMP0017318 | <i>KIAA0408</i> | KIAA0408                                                           | 0.0014 |
| ENST00000394479 | MCP0003938 | MMP0014594 | <i>REL</i>      | v-rel avian reticuloendotheliosis viral<br>oncogene homolog        | 0.0014 |
| ENST00000289359 | MCP0005854 | MMP0008461 | <i>MITD1</i>    | MIT, microtubule interacting and<br>transport, domain containing 1 | 0.0014 |
| ENST00000375077 | MCP0017522 | MMP0015837 | <i>CORO2A</i>   | coronin, actin binding protein, 2A                                 | 0.0015 |
| ENST00000249776 | MCP0002618 | MMP0013567 | <i>KNSTRN</i>   | kinetochore-localized astrin/SPAG5<br>binding protein              | 0.0015 |
| ENST00000371605 | MCP0017168 | MMP0005817 | <i>ABCA2</i>    | ATP-binding cassette, sub-family A<br>(ABC1), member 2             | 0.0016 |
| ENST00000324366 | MCP0017142 | MMP0001601 | <i>PRMT5</i>    | protein arginine methyltransferase 5                               | 0.0016 |
| ENST00000372236 | MCP0004577 | MMP0018467 | <i>POLH</i>     | polymerase (DNA directed), eta                                     | 0.0016 |
| ENST00000228887 | MCP0017874 | MMP0014991 | <i>GPRC5D</i>   | G protein-coupled receptor, class C,<br>group 5, member D          | 0.0017 |
| ENST00000294618 | MCP0018019 | MMP0003901 | <i>DOCK6</i>    | dedicator of cytokinesis 6                                         | 0.0018 |
| ENST00000269025 | MCP0000730 | MMP0007037 | <i>LRRC46</i>   | leucine rich repeat containing 46                                  | 0.0020 |
| ENST00000373368 | MCP0006150 | MMP0004180 | <i>SPP2</i>     | secreted phosphoprotein 2, 24kDa                                   | 0.0020 |
| ENST00000391588 | MCP0012404 | MMP0014927 | <i>KRTAP3-1</i> | keratin associated protein 3-1                                     | 0.0022 |
| ENST00000549091 | MCP0003001 | MMP0006493 | <i>WDR90</i>    | WD repeat domain 90                                                | 0.0023 |

|                 |            |            |                |                                                                       |        |
|-----------------|------------|------------|----------------|-----------------------------------------------------------------------|--------|
| ENST00000381821 | MCP0002417 | MMP0012852 | <i>TEX33</i>   | testis expressed 33                                                   | 0.0023 |
| ENST00000295897 | MCP0000306 | MMP0019724 | <i>ALB</i>     | albumin                                                               | 0.0023 |
| ENST00000361756 | MCP0018455 | MMP0017079 | <i>RNF121</i>  | ring finger protein 121                                               | 0.0023 |
| ENST00000264661 | MCP0012356 | MMP0006932 | <i>KCNH4</i>   | potassium channel, voltage gated eag<br>related subfamily H, member 4 | 0.0024 |
| ENST00000278742 | MCP0016769 | MMP0018597 | <i>ST14</i>    | suppression of tumorigenicity 14 (colon<br>carcinoma)                 | 0.0026 |
| ENST00000355898 | MCP0015864 | MMP0018417 | <i>ZNF507</i>  | zinc finger protein 507                                               | 0.0027 |
| ENST00000251481 | MCP0018685 | MMP0005848 | <i>SULT1C2</i> | sulfotransferase family, cytosolic, 1C,<br>member 2                   | 0.0027 |
| ENST00000265838 | MCP0006597 | MMP0020696 | <i>ACAT1</i>   | acetyl-CoA acetyltransferase 1                                        | 0.0028 |
| ENST00000328278 | MCP0018196 | MMP0011129 | <i>LRRC14B</i> | leucine rich repeat containing 14B                                    | 0.0028 |
| ENST00000611114 | MCP0007699 | MMP0004874 | <i>ZNF804B</i> | zinc finger protein 804B                                              | 0.0028 |
| ENST00000431016 | MCP0013950 | MMP0008195 | <i>PCYT1A</i>  | phosphate cytidylyltransferase 1, choline,<br>alpha                   | 0.0029 |
| ENST00000616727 | MCP0009477 | MMP0020481 | <i>MUC13</i>   | mucin 13, cell surface associated                                     | 0.0029 |
| ENST00000268766 | MCP0019423 | MMP0018895 | <i>NEK8</i>    | NIMA-related kinase 8                                                 | 0.0029 |
| ENST00000306534 | MCP0018265 | MMP0009051 | <i>ROBO4</i>   | roundabout, axon guidance receptor,<br>homolog 4 (Drosophila)         | 0.0030 |
| ENST00000295408 | MCP0007017 | MMP0010239 | <i>MERTK</i>   | MER proto-oncogene, tyrosine kinase                                   | 0.0030 |
| ENST00000394810 | MCP0005684 | MMP0005627 | <i>SYNPO2L</i> | synaptopodin 2-like                                                   | 0.0032 |
| ENST00000324444 | MCP0013626 | MMP0013848 | <i>SYNE4</i>   | spectrin repeat containing, nuclear<br>envelope family member 4       | 0.0032 |
| ENST00000431282 | MCP0007907 | MMP0014887 | <i>APOBR</i>   | apolipoprotein B receptor                                             | 0.0032 |
| ENST00000543976 | MCP0014448 | MMP0022930 | <i>TMF1</i>    | TATA element modulatory factor 1                                      | 0.0033 |
| ENST00000215886 | MCP0018753 | MMP0012866 | <i>LGALS2</i>  | lectin, galactoside-binding, soluble, 2                               | 0.0033 |
| ENST00000506113 | MCP0010371 | MMP0021546 | <i>ABLIM3</i>  | actin binding LIM protein family,<br>member 3                         | 0.0033 |
| ENST00000354666 | MCP0017215 | MMP0008867 | <i>ELOVL2</i>  | ELOVL fatty acid elongase 2                                           | 0.0033 |
| ENST00000354042 | MCP0003926 | MMP0004701 | <i>SLC13A4</i> | solute carrier family 13 (sodium/sulfate<br>symporter), member 4      | 0.0034 |
| ENST00000356575 | MCP0016969 | MMP0011779 | <i>MEGF6</i>   | multiple EGF-like-domains 6                                           | 0.0034 |
| ENST00000244709 | MCP0009903 | MMP0013921 | <i>TREM1</i>   | triggering receptor expressed on myeloid<br>cells 1                   | 0.0034 |
| ENST00000314400 | MCP0015810 | MMP0019471 | <i>C3orf17</i> | chromosome 3 open reading frame 17                                    | 0.0035 |
| ENST00000305544 | MCP0004733 | MMP0013542 | <i>LAMB2</i>   | laminin, beta 2 (laminin S)                                           | 0.0035 |
| ENST00000260563 | MCP0018133 | MMP0011335 | <i>RTCA</i>    | RNA 3'-terminal phosphate cyclase                                     | 0.0035 |
| ENST00000322344 | MCP0004077 | MMP0013763 | <i>PNKP</i>    | polynucleotide kinase 3'-phosphatase                                  | 0.0036 |
| ENST00000313961 | MCP0014297 | MMP0017195 | <i>RGS5</i>    | regulator of G-protein signaling 5                                    | 0.0037 |
| ENST00000328963 | MCP0019554 | MMP0016407 | <i>P2RX7</i>   | purinergic receptor P2X, ligand gated ion                             | 0.0038 |

|                 |            |            |                                                                                                 |        |
|-----------------|------------|------------|-------------------------------------------------------------------------------------------------|--------|
|                 |            |            | channel, 7                                                                                      |        |
| ENST00000439706 | MCP0017942 | MMP0007807 | <i>SLC38A1</i> solute carrier family 38, member 1                                               | 0.0038 |
| ENST00000452135 | MCP0016083 | MMP0006968 | <i>MAPK9</i> mitogen-activated protein kinase 9                                                 | 0.0038 |
| ENST00000324894 | MCP0003934 | MMP0001358 | <i>GTPBP3</i> GTP binding protein 3 (mitochondrial)                                             | 0.0040 |
| ENST00000226021 | MCP0000027 | MMP0021116 | <i>CACNG1</i> calcium channel, voltage-dependent, gamma subunit 1                               | 0.0041 |
| ENST00000380752 | MCP0019069 | MMP0003494 | <i>SLC7A1</i> solute carrier family 7 (cationic amino acid transporter, y+ system), member 1    | 0.0043 |
| ENST00000342203 | MCP0000920 | MMP0003716 | <i>SSX2IP</i> synovial sarcoma, X breakpoint 2 interacting protein                              | 0.0043 |
| ENST00000263681 | MCP0001224 | MMP0016227 | <i>POLD3</i> polymerase (DNA-directed), delta 3, accessory subunit                              | 0.0043 |
| ENST00000539925 | MCP0003183 | MMP0002442 | <i>LTBR</i> lymphotoxin beta receptor (TNFR superfamily, member 3)                              | 0.0045 |
| ENST00000343629 | MCP0010938 | MMP0000384 | <i>TLDC1</i> TBC/LysM-associated domain containing 1                                            | 0.0045 |
| ENST00000415318 | MCP0018547 | MMP0009442 | <i>CCDC153</i> coiled-coil domain containing 153                                                | 0.0045 |
| ENST00000394511 | MCP0011838 | MMP0000988 | <i>UGT8</i> UDP glycosyltransferase 8                                                           | 0.0046 |
| ENST00000296684 | MCP0017370 | MMP0000981 | <i>NDUFS4</i> NADH dehydrogenase (ubiquinone) Fe-S protein 4, 18kDa (NADH-coenzyme Q reductase) | 0.0046 |
| ENST00000407426 | MCP0014869 | MMP0002002 | <i>WDR43</i> WD repeat domain 43                                                                | 0.0047 |
| ENST00000542230 | MCP0007969 | MMP0011163 | <i>TMEM50B</i> transmembrane protein 50B                                                        | 0.0048 |
| ENST00000274811 | MCP0003067 | MMP0003667 | <i>RNF44</i> ring finger protein 44                                                             | 0.0048 |
| ENST00000334418 | MCP0018528 | MMP0009454 | <i>CCDC84</i> coiled-coil domain containing 84                                                  | 0.0048 |
| ENST00000355303 | MCP0013532 | MMP0002716 | <i>ANO1</i> anoctamin 1, calcium activated chloride channel                                     | 0.0049 |
| ENST00000264852 | MCP0009814 | MMP0019635 | <i>SIDT1</i> SID1 transmembrane family, member 1                                                | 0.0050 |
| ENST00000309863 | MCP0005702 | MMP0007961 | <i>GCC2</i> GRIP and coiled-coil domain containing 2                                            | 0.0050 |
| ENST00000215912 | MCP0003785 | MMP0000371 | <i>PIK3IP1</i> phosphoinositide-3-kinase interacting protein 1                                  | 0.0054 |
| ENST00000545068 | MCP0019773 | MMP0005122 | <i>FOXJ3</i> forkhead box J3                                                                    | 0.0055 |
| ENST00000330550 | MCP0016133 | MMP0015659 | <i>SLC22A16</i> solute carrier family 22 (organic cation/carnitine transporter), member 16      | 0.0055 |
| ENST00000240364 | MCP0005737 | MMP0018438 | <i>FAM117A</i> family with sequence similarity 117, member A                                    | 0.0055 |
| ENST00000300456 | MCP0004129 | MMP0016727 | <i>SLC27A4</i> solute carrier family 27 (fatty acid transporter), member 4                      | 0.0055 |
| ENST00000374566 | MCP0018084 | MMP0015061 | <i>EPB41L4B</i> erythrocyte membrane protein band 4.1 like 4B                                   | 0.0056 |

|                 |            |            |                        |                                                                                          |        |
|-----------------|------------|------------|------------------------|------------------------------------------------------------------------------------------|--------|
| ENST00000301740 | MCP0005104 | MMP0003365 | <i>SRRM2</i>           | serine/arginine repetitive matrix 2                                                      | 0.0056 |
| ENST00000344846 | MCP0003787 | MMP0001893 | <i>SYNGR4</i>          | synaptogyrin 4                                                                           | 0.0058 |
| ENST00000319211 | MCP0019438 | MMP0013162 | <i>F2R</i>             | coagulation factor II (thrombin) receptor                                                | 0.0059 |
| ENST00000356090 | MCP0001098 | MMP0018684 | <i>NCDN</i>            | neurochondrin                                                                            | 0.0059 |
| ENST00000300060 | MCP0014718 | MMP0010943 | <i>ANPEP</i>           | alanyl (membrane) aminopeptidase                                                         | 0.0060 |
| ENST00000340413 | MCP0004303 | MMP0020777 | <i>NUP43</i>           | nucleoporin 43kDa                                                                        | 0.0060 |
| ENST00000245457 | MCP0001670 | MMP0009897 | <i>PTGER2</i>          | prostaglandin E receptor 2 (subtype EP2),<br>53kDa                                       | 0.0060 |
| ENST00000289416 | MCP0013726 | MMP0011504 | <i>ACSM3</i>           | acyl-CoA synthetase medium-chain<br>family member 3                                      | 0.0062 |
| ENST00000324001 | MCP0017442 | MMP0020847 | <i>PRX</i>             | periaxin                                                                                 | 0.0064 |
| ENST00000323563 | MCP0007589 | MMP0004153 | <i>MRPS31</i>          | mitochondrial ribosomal protein S31                                                      | 0.0064 |
| ENST00000402418 | MCP0020037 | MMP0010176 | <i>SLC25A19</i>        | solute carrier family 25 (mitochondrial<br>thiamine pyrophosphate carrier), member<br>19 | 0.0066 |
| ENST00000367500 | MCP0018845 | MMP0007546 | <i>SWT1</i>            | SWT1 RNA endoribonuclease homolog<br>( <i>S. cerevisiae</i> )                            | 0.0066 |
| ENST00000247138 | MCP0017955 | MMP0017948 | <i>SLC35A2</i>         | solute carrier family 35 (UDP-galactose<br>transporter), member A2                       | 0.0067 |
| ENST00000292432 | MCP0003074 | MMP0003660 | <i>HK3</i>             | hexokinase 3 (white cell)                                                                | 0.0070 |
| ENST00000266943 | MCP0004222 | MMP0021379 | <i>SLC46A3</i>         | solute carrier family 46, member 3                                                       | 0.0070 |
| ENST00000517768 | MCP0004190 | MMP0010549 | <i>MYOZ3</i>           | myozenin 3                                                                               | 0.0072 |
| ENST00000391809 | MCP0012341 | MMP0013799 | <i>KLK5</i>            | kallikrein-related peptidase 5                                                           | 0.0073 |
| ENST00000449910 | MCP0011050 | MMP0010488 | <i>ADAM15</i>          | ADAM metallopeptidase domain 15                                                          | 0.0074 |
| ENST00000308278 | MCP0017882 | MMP0004783 | <i>FAM57A</i>          | family with sequence similarity 57,<br>member A                                          | 0.0074 |
| ENST00000245663 | MCP0000136 | MMP0003285 | <i>ZBTB46</i>          | zinc finger and BTB domain containing<br>46                                              | 0.0075 |
| ENST00000330498 | MCP0005710 | MMP0005291 | <i>SLC5A2</i>          | solute carrier family 5 (sodium/glucose<br>cotransporter), member 2                      | 0.0079 |
| ENST00000217407 | MCP0019043 | MMP0006507 | <i>LBP</i>             | lipopolysaccharide binding protein                                                       | 0.0079 |
| ENST00000354753 | MCP0016915 | MMP0004855 | <i>GPSM1</i>           | G-protein signaling modulator 1                                                          | 0.0079 |
| ENST00000301645 | MCP0014225 | MMP0001776 | <i>CYP7A1</i>          | cytochrome P450, family 7, subfamily A,<br>polypeptide 1                                 | 0.0080 |
| ENST00000263593 | MCP0001387 | MMP0009049 | <i>SIAE</i>            | sialic acid acetyltransferase                                                            | 0.0080 |
| ENST00000621632 | MCP0001103 | MMP0017093 | <i>DDX24</i>           | DEAD (Asp-Glu-Ala-Asp) box helicase<br>24                                                | 0.0081 |
| ENST00000447092 | MCP0003849 | MMP0023062 | <i>HYAL2</i>           | hyaluronoglucosaminidase 2                                                               | 0.0082 |
| ENST00000359088 | MCP0007332 | MMP0017878 | <i>ST6GALNA<br/>C1</i> | ST6 (alpha-N-acetyl-neuraminyl-2,3-<br>beta-galactosyl-1,3)-N-                           | 0.0083 |

|                 |            |            |                |                                                                                                                 |            |
|-----------------|------------|------------|----------------|-----------------------------------------------------------------------------------------------------------------|------------|
|                 |            |            |                | acetylgalactosaminide<br>sialyltransferase 1                                                                    | alpha-2,6- |
| ENST00000233615 | MCP0019960 | MMP0021807 | <i>WBP1</i>    | WW domain binding protein 1                                                                                     | 0.0083     |
| ENST00000361840 | MCP0010459 | MMP0000525 | <i>SPRYD7</i>  | SPRY domain containing 7                                                                                        | 0.0085     |
| ENST00000389722 | MCP0013161 | MMP0018690 | <i>SPTB</i>    | spectrin, beta, erythrocytic                                                                                    | 0.0091     |
| ENST00000411641 | MCP0015400 | MMP0000222 | <i>AHSG</i>    | alpha-2-HS-glycoprotein                                                                                         | 0.0091     |
| ENST00000616898 | MCP0003819 | MMP0005509 | <i>HEMGN</i>   | hemogen                                                                                                         | 0.0091     |
| ENST00000370630 | MCP0000919 | MMP0003715 | <i>CTBS</i>    | chitinase, di-N-acetyl-                                                                                         | 0.0092     |
| ENST00000550527 | MCP0014906 | MMP0012839 | <i>APAF1</i>   | apoptotic peptidase activating factor 1                                                                         | 0.0092     |
| ENST00000327042 | MCP0011082 | MMP0012434 | <i>TMEM86B</i> | transmembrane protein 86B                                                                                       | 0.0092     |
| ENST00000373574 | MCP0012203 | MMP0007019 | <i>WDR38</i>   | WD repeat domain 38                                                                                             | 0.0092     |
| ENST00000373921 | MCP0015227 | MMP0017398 | <i>THEMIS2</i> | thymocyte selection associated family<br>member 2                                                               | 0.0092     |
| ENST00000593360 | MCP0015953 | MMP0001364 | <i>HAUS8</i>   | HAUS augmin-like complex, subunit 8                                                                             | 0.0093     |
| ENST00000325207 | MCP0015257 | MMP0001745 | <i>RIC8A</i>   | RIC8 guanine nucleotide exchange factor<br>A                                                                    | 0.0097     |
| ENST00000360586 | MCP0000997 | MMP0019124 | <i>WDHD1</i>   | WD repeat and HMG-box DNA binding<br>protein 1                                                                  | 0.0099     |
| ENST00000358430 | MCP0003232 | MMP0002103 | <i>TXLNB</i>   | taxilin beta                                                                                                    | 0.0099     |
| ENST00000337526 | MCP0008816 | MMP0001505 | <i>RTN4</i>    | reticulon 4                                                                                                     | 0.0100     |
| ENST00000301919 | MCP0011580 | MMP0014551 | <i>MSANTD4</i> | Myb/SANT-like DNA-binding domain<br>containing 4 with coiled-coils                                              | 0.0100     |
| ENST00000352105 | MCP0017673 | MMP0016505 | <i>ACAN</i>    | aggrecan                                                                                                        | 0.0103     |
| ENST00000209929 | MCP0019534 | MMP0017754 | <i>FMO2</i>    | flavin containing monooxygenase 2 (non-<br>functional)                                                          | 0.0110     |
| ENST00000334186 | MCP0018062 | MMP0004021 | <i>PPFIA3</i>  | protein tyrosine phosphatase, receptor<br>type, f polypeptide (PTPRF), interacting<br>protein (liprin), alpha 3 | 0.0114     |
| ENST00000223129 | MCP0002345 | MMP0014069 | <i>RPA3</i>    | replication protein A3, 14kDa                                                                                   | 0.0115     |
| ENST00000267082 | MCP0009066 | MMP0008491 | <i>ITGB7</i>   | integrin, beta 7                                                                                                | 0.0116     |
| ENST00000602404 | MCP0005556 | MMP0004720 | <i>NDUFA6</i>  | NADH dehydrogenase (ubiquinone) 1<br>alpha subcomplex, 6, 14kDa                                                 | 0.0117     |
| ENST00000452691 | MCP0004730 | MMP0013547 | <i>CCDC36</i>  | coiled-coil domain containing 36                                                                                | 0.0117     |
| ENST00000366844 | MCP0007354 | MMP0015889 | <i>ENAH</i>    | enabled homolog (Drosophila)                                                                                    | 0.0117     |
| ENST00000269373 | MCP0013449 | MMP0021667 | <i>FN3KRP</i>  | fructosamine 3 kinase related protein                                                                           | 0.0121     |
| ENST00000296161 | MCP0016527 | MMP0006292 | <i>DTX3L</i>   | deltex 3 like, E3 ubiquitin ligase                                                                              | 0.0122     |
| ENST00000311907 | MCP0003090 | MMP0018178 | <i>F2</i>      | coagulation factor II (thrombin)                                                                                | 0.0123     |
| ENST00000308304 | MCP0009102 | MMP0017064 | <i>PROPI</i>   | PROP paired-like homeobox 1                                                                                     | 0.0125     |
| ENST00000457542 | MCP0006577 | MMP0016026 | <i>MAPKBPI</i> | mitogen-activated protein kinase binding<br>protein 1                                                           | 0.0125     |
| ENST00000307017 | MCP0002694 | MMP0011274 | <i>USP38</i>   | ubiquitin specific peptidase 38                                                                                 | 0.0127     |

|                 |            |            |                 |                                                                    |        |
|-----------------|------------|------------|-----------------|--------------------------------------------------------------------|--------|
| ENST00000398955 | MCP0007453 | MMP0013031 | <i>MGARP</i>    | mitochondria-localized glutamic acid-rich protein                  | 0.0130 |
| ENST00000560491 | MCP0007085 | MMP0020598 | <i>LYSMD2</i>   | LysM, putative peptidoglycan-binding, domain containing 2          | 0.0130 |
| ENST00000354955 | MCP0014950 | MMP0002579 | <i>FMOD</i>     | fibromodulin                                                       | 0.0131 |
| ENST00000370646 | MCP0003657 | MMP0022557 | <i>HOGA1</i>    | 4-hydroxy-2-oxoglutarate aldolase 1                                | 0.0132 |
| ENST00000260970 | MCP0004809 | MMP0009231 | <i>PPIG</i>     | peptidylprolyl isomerase G (cyclophilin G)                         | 0.0132 |
| ENST00000216223 | MCP0002419 | MMP0012854 | <i>IL2RB</i>    | interleukin 2 receptor, beta                                       | 0.0133 |
| ENST00000379144 | MCP0000296 | MMP0013153 | <i>PCYT1B</i>   | phosphate cytidylyltransferase 1, choline, beta                    | 0.0134 |
| ENST00000370978 | MCP0000772 | MMP0021084 | <i>ZNF280C</i>  | zinc finger protein 280C                                           | 0.0135 |
| ENST00000368662 | MCP0011383 | MMP0016855 | <i>TUBE1</i>    | tubulin, epsilon 1                                                 | 0.0136 |
| ENST00000337508 | MCP0010776 | MMP0010042 | <i>NRIP2</i>    | nuclear receptor interacting protein 2                             | 0.0137 |
| ENST00000522447 | MCP0002806 | MMP0011283 | <i>LACTB2</i>   | lactamase, beta 2                                                  | 0.0139 |
| ENST00000351989 | MCP0013788 | MMP0020268 | <i>DGCR8</i>    | DGCR8 microprocessor complex subunit                               | 0.0142 |
| ENST00000263383 | MCP0008985 | MMP0002425 | <i>ILVBL</i>    | ilvB (bacterial acetolactate synthase)-like                        | 0.0142 |
| ENST00000374672 | MCP0006831 | MMP0010874 | <i>KLF4</i>     | Kruppel-like factor 4 (gut)                                        | 0.0144 |
| ENST00000428726 | MCP0000978 | MMP0023338 | <i>CD44</i>     | CD44 molecule (Indian blood group)                                 | 0.0144 |
| ENST00000589872 | MCP0016178 | MMP0021992 | <i>NBR1</i>     | neighbor of BRCA1 gene 1                                           | 0.0148 |
| ENST00000358242 | MCP0005976 | MMP0007904 | <i>DMTN</i>     | dematin actin binding protein                                      | 0.0151 |
| ENST00000378313 | MCP0009768 | MMP0009843 | <i>C19orf54</i> | chromosome 19 open reading frame 54                                | 0.0153 |
| ENST00000266754 | MCP0019383 | MMP0005009 | <i>GAS2L3</i>   | growth arrest-specific 2 like 3                                    | 0.0156 |
| ENST00000361632 | MCP0004387 | MMP0008043 | <i>CSF3R</i>    | colony stimulating factor 3 receptor (granulocyte)                 | 0.0158 |
| ENST00000336431 | MCP0011090 | MMP0002047 | <i>GGT7</i>     | gamma-glutamyltransferase 7                                        | 0.0159 |
| ENST00000356517 | MCP0001853 | MMP0019384 | <i>AADACL2</i>  | arylacetamide deacetylase-like 2                                   | 0.0160 |
| ENST00000342427 | MCP0020078 | MMP0006212 | <i>ZNF341</i>   | zinc finger protein 341                                            | 0.0162 |
| ENST00000378079 | MCP0017117 | MMP0012259 | <i>FBXO47</i>   | F-box protein 47                                                   | 0.0163 |
| ENST00000361249 | MCP0010977 | MMP0013244 | <i>C8A</i>      | complement component 8, alpha polypeptide                          | 0.0165 |
| ENST00000373256 | MCP0019426 | MMP0011949 | <i>GLP1R</i>    | glucagon-like peptide 1 receptor                                   | 0.0165 |
| ENST00000318663 | MCP0006710 | MMP0003096 | <i>ORAI3</i>    | ORAI calcium release-activated calcium modulator 3                 | 0.0165 |
| ENST00000491431 | MCP0011328 | MMP0020561 | <i>ZNF786</i>   | zinc finger protein 786                                            | 0.0166 |
| ENST00000373795 | MCP0002472 | MMP0011315 | <i>SRSF4</i>    | serine/arginine-rich splicing factor 4                             | 0.0167 |
| ENST00000368842 | MCP0006994 | MMP0008481 | <i>LHPP</i>     | phospholysine phosphohistidine inorganic pyrophosphate phosphatase | 0.0167 |

|                 |            |            |                |                                                                            |        |
|-----------------|------------|------------|----------------|----------------------------------------------------------------------------|--------|
| ENST00000338560 | MCP0019120 | MMP0016525 | <i>TRPV2</i>   | transient receptor potential cation channel, subfamily V, member 2         | 0.0169 |
| ENST00000599564 | MCP0006528 | MMP0000806 | <i>GRAMD1A</i> | GRAM domain containing 1A                                                  | 0.0170 |
| ENST00000343484 | MCP0016587 | MMP0003292 | <i>TCEA2</i>   | transcription elongation factor A (SII), 2                                 | 0.0171 |
| ENST00000253801 | MCP0016167 | MMP0021988 | <i>G6PC</i>    | glucose-6-phosphatase, catalytic subunit                                   | 0.0171 |
| ENST00000341500 | MCP0002795 | MMP0008821 | <i>INSR</i>    | insulin receptor                                                           | 0.0171 |
| ENST00000378357 | MCP0015565 | MMP0022380 | <i>CA9</i>     | carbonic anhydrase IX                                                      | 0.0175 |
| ENST00000359128 | MCP0000445 | MMP0006146 | <i>NLRC3</i>   | NLR family, CARD domain containing 3                                       | 0.0175 |
| ENST00000007722 | MCP0005741 | MMP0000160 | <i>ITGA3</i>   | integrin, alpha 3 (antigen CD49C, alpha 3 subunit of VLA-3 receptor)       | 0.0177 |
| ENST00000324464 | MCP0009769 | MMP0002064 | <i>ADCK4</i>   | aarF domain containing kinase 4                                            | 0.0179 |
| ENST00000370611 | MCP0012259 | MMP0003720 | <i>LPAR3</i>   | lysophosphatidic acid receptor 3                                           | 0.0180 |
| ENST00000344657 | MCP0009992 | MMP0007014 | <i>SPHKAP</i>  | SPHK1 interactor, AKAP domain containing                                   | 0.0181 |
| ENST00000436063 | MCP0002089 | MMP0018374 | <i>DNTTIP2</i> | deoxynucleotidyltransferase, terminal, interacting protein 2               | 0.0181 |
| ENST00000347842 | MCP0000655 | MMP0005502 | <i>ASIC4</i>   | acid sensing (proton gated) ion channel family member 4                    | 0.0182 |
| ENST00000320027 | MCP0004993 | MMP0018827 | <i>HSPH1</i>   | heat shock 105kDa/110kDa protein 1                                         | 0.0185 |
| ENST00000521315 | MCP0005965 | MMP0008119 | <i>SFTPC</i>   | surfactant protein C                                                       | 0.0187 |
| ENST00000344206 | MCP0006746 | MMP0023042 | <i>MST1R</i>   | macrophage stimulating 1 receptor                                          | 0.0188 |
| ENST00000487519 | MCP0006585 | MMP0009797 | <i>TFAM</i>    | transcription factor A, mitochondrial                                      | 0.0194 |
| ENST00000396091 | MCP0013441 | MMP0012082 | <i>ANO10</i>   | anoctamin 10                                                               | 0.0194 |
| ENST00000372838 | MCP0004130 | MMP0012292 | <i>CERCAM</i>  | cerebral endothelial cell adhesion molecule                                | 0.0195 |
| ENST00000072869 | MCP0014531 | MMP0010736 | <i>ADCK2</i>   | aarF domain containing kinase 2                                            | 0.0195 |
| ENST00000274605 | MCP0010862 | MMP0016560 | <i>N4BP3</i>   | NEDD4 binding protein 3                                                    | 0.0195 |
| ENST00000378750 | MCP0001807 | MMP0006321 | <i>PEX16</i>   | peroxisomal biogenesis factor 16                                           | 0.0197 |
| ENST00000262753 | MCP0007362 | MMP0003307 | <i>POF1B</i>   | premature ovarian failure, 1B                                              | 0.0201 |
| ENST00000358807 | MCP0008894 | MMP0008203 | <i>MICAL1</i>  | microtubule associated monooxygenase, calponin and LIM domain containing 1 | 0.0204 |
| ENST00000290472 | MCP0017819 | MMP0016029 | <i>PLA2G4D</i> | phospholipase A2, group IVD (cytosolic)                                    | 0.0204 |
| ENST00000486442 | MCP0011737 | MMP0018623 | <i>KLHL29</i>  | kelch-like family member 29                                                | 0.0207 |
| ENST00000268379 | MCP0014411 | MMP0019697 | <i>UQCRC2</i>  | ubiquinol-cytochrome c reductase core protein II                           | 0.0207 |
| ENST00000370759 | MCP0000461 | MMP0021023 | <i>GIPC2</i>   | GIPC PDZ domain containing family, member 2                                | 0.0209 |
| ENST00000504930 | MCP0006210 | MMP0017961 | <i>POLR3G</i>  | polymerase (RNA) III (DNA directed) polypeptide G (32kD)                   | 0.0209 |
| ENST00000357175 | MCP0017012 | MMP0000275 | <i>MUMILI</i>  | melanoma associated antigen (mutated)                                      | 0.0213 |



|                 |            |            |                                                                       |        |
|-----------------|------------|------------|-----------------------------------------------------------------------|--------|
|                 |            |            | 1-like 1                                                              |        |
| ENST00000225174 | MCP0011163 | MMP0010105 | <i>PPIF</i> peptidylprolyl isomerase F                                | 0.0213 |
| ENST00000281722 | MCP0018684 | MMP0001866 | <i>RBM46</i> RNA binding motif protein 46                             | 0.0214 |
| ENST00000402105 | MCP0013036 | MMP0000963 | <i>HPS4</i> Hermansky-Pudlak syndrome 4                               | 0.0215 |
| ENST00000301908 | MCP0005275 | MMP0003962 | <i>PNOC</i> prepronociceptin                                          | 0.0216 |
| ENST00000356443 | MCP0016738 | MMP0011564 | <i>MYOM1</i> myomesin 1                                               | 0.0219 |
| ENST00000257909 | MCP0015119 | MMP0018357 | <i>TROAP</i> trophinin associated protein                             | 0.0220 |
| ENST00000342315 | MCP0019800 | MMP0010055 | <i>OAS2</i> 2'-5'-oligoadenylate synthetase 2, 69/71kDa               | 0.0221 |
| ENST00000256190 | MCP0005252 | MMP0019435 | <i>SBF2</i> SET binding factor 2                                      | 0.0223 |
| ENST00000328119 | MCP0012382 | MMP0015051 | <i>KRT36</i> keratin 36, type I                                       | 0.0224 |
| ENST00000273183 | MCP0002165 | MMP0015548 | <i>STAC</i> SH3 and cysteine rich domain                              | 0.0225 |
| ENST00000370853 | MCP0013876 | MMP0001106 | <i>MBNL3</i> muscleblind-like splicing regulator 3                    | 0.0226 |
| ENST00000551812 | MCP0011596 | MMP0006972 | <i>BAZ2A</i> bromodomain adjacent to zinc finger domain, 2A           | 0.0226 |
| ENST00000263816 | MCP0016283 | MMP0000802 | <i>LRP2</i> low density lipoprotein receptor-related protein 2        | 0.0227 |
| ENST00000382751 | MCP0010551 | MMP0010509 | <i>URB1</i> URB1 ribosome biogenesis 1 homolog (S. cerevisiae)        | 0.0228 |
| ENST00000617259 | MCP0012431 | MMP0003984 | <i>IL13</i> interleukin 13                                            | 0.0230 |
| ENST00000253686 | MCP0001504 | MMP0007745 | <i>MRPS25</i> mitochondrial ribosomal protein S25                     | 0.0231 |
| ENST00000378043 | MCP0007191 | MMP0016825 | <i>BEST1</i> bestrophin 1                                             | 0.0232 |
| ENST00000287295 | MCP0018314 | MMP0021081 | <i>AIFM1</i> apoptosis-inducing factor, 1 mitochondrion-associated, 1 | 0.0235 |
| ENST00000228936 | MCP0012592 | MMP0023387 | <i>ART4</i> ADP-ribosyltransferase 4 (Dombrock blood group)           | 0.0238 |
| ENST00000216274 | MCP0014040 | MMP0022997 | <i>RIPK3</i> receptor-interacting serine-threonine kinase 3           | 0.0240 |
| ENST00000320005 | MCP0002024 | MMP0018307 | <i>CNGB3</i> cyclic nucleotide gated channel beta 3                   | 0.0242 |
| ENST00000229729 | MCP0014390 | MMP0018839 | <i>SLC44A4</i> solute carrier family 44, member 4                     | 0.0243 |
| ENST00000294818 | MCP0016138 | MMP0014854 | <i>LRRC52</i> leucine rich repeat containing 52                       | 0.0244 |
| ENST00000318315 | MCP0006161 | MMP0022978 | <i>C5orf46</i> chromosome 5 open reading frame 46                     | 0.0244 |
| ENST00000369478 | MCP0009172 | MMP0001338 | <i>CD2</i> CD2 molecule                                               | 0.0245 |
| ENST00000316428 | MCP0003115 | MMP0002258 | <i>LRRC31</i> leucine rich repeat containing 31                       | 0.0248 |
| ENST00000392588 | MCP0008467 | MMP0016019 | <i>WASF1</i> WAS protein family, member 1                             | 0.0250 |
| ENST00000279873 | MCP0015156 | MMP0010966 | <i>ARID5B</i> AT rich interactive domain 5B (MRF1-like)               | 0.0251 |
| ENST00000301671 | MCP0012355 | MMP0006933 | <i>GHDC</i> GH3 domain containing                                     | 0.0253 |
| ENST00000358241 | MCP0015861 | MMP0011975 | <i>RTP2</i> receptor (chemosensory) transporter protein 2             | 0.0254 |

|                 |            |            |                  |                                                                              |        |
|-----------------|------------|------------|------------------|------------------------------------------------------------------------------|--------|
| ENST00000252032 | MCP0012682 | MMP0003973 | <i>C20orf194</i> | chromosome 20 open reading frame 194                                         | 0.0254 |
| ENST00000254928 | MCP0019425 | MMP0018894 | <i>ERAL1</i>     | Era-like 12S mitochondrial rRNA chaperone 1                                  | 0.0256 |
| ENST00000216471 | MCP0014469 | MMP0019215 | <i>SAMD15</i>    | sterile alpha motif domain containing 15                                     | 0.0256 |
| ENST00000223026 | MCP0013849 | MMP0019748 | <i>HYAL4</i>     | hyaluronoglucosaminidase 4                                                   | 0.0259 |
| ENST00000255039 | MCP0006306 | MMP0000774 | <i>HAPLN2</i>    | hyaluronan and proteoglycan link protein 2                                   | 0.0260 |
| ENST00000366518 | MCP0017619 | MMP0021968 | <i>KIF26B</i>    | kinesin family member 26B                                                    | 0.0262 |
| ENST00000297596 | MCP0018348 | MMP0016530 | <i>GEM</i>       | GTP binding protein overexpressed in skeletal muscle                         | 0.0265 |
| ENST00000371901 | MCP0006938 | MMP0003865 | <i>CYP4X1</i>    | cytochrome P450, family 4, subfamily X, polypeptide 1                        | 0.0269 |
| ENST00000367025 | MCP0002075 | MMP0019880 | <i>TRAF3IP3</i>  | TRAF3 interacting protein 3                                                  | 0.0269 |
| ENST00000594369 | MCP0007755 | MMP0022304 | <i>ZNF446</i>    | zinc finger protein 446                                                      | 0.0271 |
| ENST00000268124 | MCP0017667 | MMP0007595 | <i>POLG</i>      | polymerase (DNA directed), gamma                                             | 0.0274 |
| ENST00000371980 | MCP0012607 | MMP0003592 | <i>LURAP1</i>    | leucine rich adaptor protein 1                                               | 0.0275 |
| ENST00000389194 | MCP0003387 | MMP0020809 | <i>LTN1</i>      | listerin E3 ubiquitin protein ligase 1                                       | 0.0275 |
| ENST00000544455 | MCP0016017 | MMP0012495 | <i>BRCA2</i>     | breast cancer 2, early onset                                                 | 0.0278 |
| ENST00000372479 | MCP0002921 | MMP0017770 | <i>RBM41</i>     | RNA binding motif protein 41                                                 | 0.0282 |
| ENST00000454584 | MCP0012178 | MMP0018514 | <i>GAS2</i>      | growth arrest-specific 2                                                     | 0.0282 |
| ENST00000264499 | MCP0009711 | MMP0007162 | <i>BBS7</i>      | Bardet-Biedl syndrome 7                                                      | 0.0283 |
| ENST00000310823 | MCP0013431 | MMP0011525 | <i>ADAM17</i>    | ADAM metalloproteinase domain 17                                             | 0.0285 |
| ENST00000447906 | MCP0016536 | MMP0011234 | <i>OTUD4</i>     | OTU deubiquitinase 4                                                         | 0.0286 |
| ENST00000548660 | MCP0016668 | MMP0013267 | <i>GLT8D2</i>    | glycosyltransferase 8 domain containing 2                                    | 0.0291 |
| ENST00000408910 | MCP0011260 | MMP0012771 | <i>UMODL1</i>    | uromodulin-like 1                                                            | 0.0291 |
| ENST00000330342 | MCP0005412 | MMP0009538 | <i>ATP6V0A2</i>  | ATPase, H <sup>+</sup> transporting, lysosomal V0 subunit a2                 | 0.0294 |
| ENST00000315939 | MCP0014652 | MMP0002522 | <i>WNK1</i>      | WNK lysine deficient protein kinase 1                                        | 0.0295 |
| ENST00000409652 | MCP0009467 | MMP0010667 | <i>APOL6</i>     | apolipoprotein L, 6                                                          | 0.0298 |
| ENST00000552570 | MCP0009953 | MMP0022593 | <i>TNS2</i>      | tensin 2                                                                     | 0.0299 |
| ENST00000441366 | MCP0013779 | MMP0015144 | <i>EPB42</i>     | erythrocyte membrane protein band 4.2                                        | 0.0300 |
| ENST00000613904 | MCP0000800 | MMP0022899 | <i>TTI2</i>      | TELO2 interacting protein 2                                                  | 0.0301 |
| ENST00000531316 | MCP0000865 | MMP0022729 | <i>C11orf63</i>  | chromosome 11 open reading frame 63                                          | 0.0302 |
| ENST00000619684 | MCP0013903 | MMP0004499 | <i>KIAA1524</i>  | KIAA1524                                                                     | 0.0305 |
| ENST00000263663 | MCP0000943 | MMP0018392 | <i>TAF1B</i>     | TATA box binding protein (TBP)-associated factor, RNA polymerase I, B, 63kDa | 0.0307 |
| ENST00000266971 | MCP0013648 | MMP0004763 | <i>SUOX</i>      | sulfite oxidase                                                              | 0.0309 |
| ENST00000202556 | MCP0003446 | MMP0012094 | <i>PPP1R13B</i>  | protein phosphatase 1, regulatory subunit                                    | 0.0311 |

|                 |            |            |                 |                                                                                 |
|-----------------|------------|------------|-----------------|---------------------------------------------------------------------------------|
|                 |            |            | 13B             |                                                                                 |
| ENST00000254508 | MCP0009571 | MMP0006747 | <i>NUP210</i>   | nucleoporin 210kDa 0.0312                                                       |
| ENST00000302250 | MCP0002176 | MMP0009244 | <i>FAM151A</i>  | family with sequence similarity 151, member A 0.0313                            |
| ENST00000382492 | MCP0019195 | MMP0001867 | <i>TAS2R1</i>   | taste receptor, type 2, member 1 0.0317                                         |
| ENST00000441564 | MCP0020157 | MMP0018382 | <i>PSD4</i>     | pleckstrin and Sec7 domain containing 4 0.0317                                  |
| ENST00000223836 | MCP0017617 | MMP0007936 | <i>AK1</i>      | adenylate kinase 1 0.0318                                                       |
| ENST00000358755 | MCP0005575 | MMP0017408 | <i>FZD6</i>     | frizzled class receptor 6 0.0320                                                |
| ENST00000225275 | MCP0016854 | MMP0005707 | <i>MPO</i>      | myeloperoxidase 0.0322                                                          |
| ENST00000395048 | MCP0017309 | MMP0003875 | <i>CYP1A1</i>   | cytochrome P450, family 1, subfamily A, polypeptide 1 0.0323                    |
| ENST00000395343 | MCP0011403 | MMP0023107 | <i>DIDO1</i>    | death inducer-obliterator 1 0.0325                                              |
| ENST00000547303 | MCP0013065 | MMP0004933 | <i>DDIT3</i>    | DNA-damage-inducible transcript 3 0.0331                                        |
| ENST00000371941 | MCP0005304 | MMP0009152 | <i>PREX1</i>    | phosphatidylinositol-3,4,5-trisphosphate-dependent Rac exchange factor 1 0.0334 |
| ENST00000399645 | MCP0000449 | MMP0006148 | <i>C16orf90</i> | chromosome 16 open reading frame 90 0.0334                                      |
| ENST00000271636 | MCP0018789 | MMP0006678 | <i>CGN</i>      | cingulin 0.0335                                                                 |
| ENST00000378910 | MCP0003244 | MMP0000620 | <i>NPHS1</i>    | nephrosis 1, congenital, Finnish type (nephrin) 0.0336                          |
| ENST00000373347 | MCP0014149 | MMP0011869 | <i>DLGAP3</i>   | discs, large (Drosophila) homolog-associated protein 3 0.0337                   |
| ENST00000373362 | MCP0014152 | MMP0011866 | <i>GJB3</i>     | gap junction protein, beta 3, 31kDa 0.0337                                      |
| ENST00000339777 | MCP0012322 | MMP0017512 | <i>LRRC43</i>   | leucine rich repeat containing 43 0.0339                                        |
| ENST00000340990 | MCP0015698 | MMP0021217 | <i>ADIPOR1</i>  | adiponectin receptor 1 0.0339                                                   |
| ENST00000378673 | MCP0016480 | MMP0008644 | <i>GDF9</i>     | growth differentiation factor 9 0.0343                                          |
| ENST00000228837 | MCP0014289 | MMP0021398 | <i>FGF6</i>     | fibroblast growth factor 6 0.0343                                               |
| ENST00000361256 | MCP0011630 | MMP0008295 | <i>C9orf114</i> | chromosome 9 open reading frame 114 0.0345                                      |
| ENST00000216487 | MCP0006109 | MMP0021879 | <i>RIN3</i>     | Ras and Rab interactor 3 0.0348                                                 |
| ENST00000320634 | MCP0011619 | MMP0004344 | <i>FAIM2</i>    | Fas apoptotic inhibitory molecule 2 0.0350                                      |
| ENST00000374954 | MCP0013496 | MMP0001124 | <i>ASIP</i>     | agouti signaling protein 0.0353                                                 |
| ENST00000573584 | MCP0010752 | MMP0006662 | <i>NUP88</i>    | nucleoporin 88kDa 0.0353                                                        |
| ENST00000409991 | MCP0018538 | MMP0009448 | <i>NLRX1</i>    | NLR family member X1 0.0354                                                     |
| ENST00000340611 | MCP0001629 | MMP0023234 | <i>BRAT1</i>    | BRCA1-associated ATM activator 1 0.0355                                         |
| ENST00000331456 | MCP0006745 | MMP0023043 | <i>TRAIIP</i>   | TRAF interacting protein 0.0356                                                 |
| ENST00000401399 | MCP0019651 | MMP0023154 | <i>NFASC</i>    | neurofascin 0.0358                                                              |
| ENST00000370017 | MCP0012422 | MMP0018767 | <i>FNDCC7</i>   | fibronectin type III domain containing 7 0.0358                                 |
| ENST00000263314 | MCP0016354 | MMP0005860 | <i>P2RX3</i>    | purinergic receptor P2X, ligand gated ion channel, 3 0.0359                     |
| ENST00000398712 | MCP0008237 | MMP0020956 | <i>SHARPIN</i>  | SHANK-associated RH domain interactor 0.0359                                    |
| ENST00000551568 | MCP0015111 | MMP0009618 | <i>CPM</i>      | carboxypeptidase M 0.0360                                                       |
| ENST00000357089 | MCP0004560 | MMP0005830 | <i>UBXN11</i>   | UBX domain protein 11 0.0361                                                    |

|                 |            |            |                |                                                                                     |        |
|-----------------|------------|------------|----------------|-------------------------------------------------------------------------------------|--------|
| ENST00000380379 | MCP0005453 | MMP0017402 | <i>BPHL</i>    | biphenyl hydrolase-like (serine hydrolase)                                          | 0.0362 |
| ENST00000495893 | MCP0018184 | MMP0007567 | <i>PHC3</i>    | polyhomeotic homolog 3 (Drosophila)                                                 | 0.0363 |
| ENST00000518444 | MCP0006591 | MMP0023036 | <i>LARP4</i>   | La ribonucleoprotein domain family, member 4                                        | 0.0363 |
| ENST00000258403 | MCP0009994 | MMP0006068 | <i>SLC19A3</i> | solute carrier family 19 (thiamine transporter), member 3                           | 0.0366 |
| ENST00000409423 | MCP0015797 | MMP0004754 | <i>NCAPG2</i>  | non-SMC condensin II complex, subunit G2                                            | 0.0370 |
| ENST00000287497 | MCP0004385 | MMP0004069 | <i>ITGAM</i>   | integrin, alpha M (complement component 3 receptor 3 subunit)                       | 0.0375 |
| ENST00000409655 | MCP0019334 | MMP0001742 | <i>ATHL1</i>   | ATH1, acid trehalase-like 1 (yeast)                                                 | 0.0377 |
| ENST00000374479 | MCP0001536 | MMP0020606 | <i>FUCA1</i>   | fucosidase, alpha-L- 1, tissue                                                      | 0.0378 |
| ENST00000239440 | MCP0014237 | MMP0002154 | <i>ARAP3</i>   | ArfGAP with RhoGAP domain, ankyrin repeat and PH domain 3                           | 0.0381 |
| ENST00000355710 | MCP0019667 | MMP0010315 | <i>RET</i>     | ret proto-oncogene                                                                  | 0.0387 |
| ENST00000376236 | MCP0017424 | MMP0007618 | <i>APBB1IP</i> | amyloid beta (A4) precursor protein-binding, family B, member 1 interacting protein | 0.0388 |
| ENST00000376042 | MCP0014429 | MMP0012318 | <i>CCNB3</i>   | cyclin B3                                                                           | 0.0393 |
| ENST00000371139 | MCP0014209 | MMP0015425 | <i>SH2D1A</i>  | SH2 domain containing 1A                                                            | 0.0394 |
| ENST00000226067 | MCP0017959 | MMP0023337 | <i>HLF</i>     | hepatic leukemia factor                                                             | 0.0394 |
| ENST00000392692 | MCP0009724 | MMP0009221 | <i>ECT2</i>    | epithelial cell transforming 2                                                      | 0.0399 |
| ENST00000457717 | MCP0015300 | MMP0000748 | <i>MTTP</i>    | microsomal triglyceride transfer protein                                            | 0.0401 |
| ENST00000372626 | MCP0010273 | MMP0005152 | <i>TCEAL1</i>  | transcription elongation factor A (SII)-like 1                                      | 0.0406 |
| ENST00000315251 | MCP0005367 | MMP0004513 | <i>CHDH</i>    | choline dehydrogenase                                                               | 0.0411 |
| ENST00000262415 | MCP0010589 | MMP0001013 | <i>DHX8</i>    | DEAH (Asp-Glu-Ala-His) box polypeptide 8                                            | 0.0411 |
| ENST00000325680 | MCP0008831 | MMP0001371 | <i>YLPM1</i>   | YLP motif containing 1                                                              | 0.0414 |
| ENST00000328886 | MCP0001924 | MMP0010218 | <i>TMIGD1</i>  | transmembrane and immunoglobulin domain containing 1                                | 0.0414 |
| ENST00000449682 | MCP0012616 | MMP0015381 | <i>MST1</i>    | macrophage stimulating 1                                                            | 0.0415 |
| ENST00000378387 | MCP0015555 | MMP0022373 | <i>ARHGEF3</i> | Rho guanine nucleotide exchange factor (GEF) 39                                     | 0.0416 |
| ENST00000263577 | MCP0007381 | MMP0007092 | <i>CDON</i>    | cell adhesion associated, oncogene regulated                                        | 0.0422 |
| ENST00000284288 | MCP0001385 | MMP0009043 | <i>PANX3</i>   | pannexin 3                                                                          | 0.0426 |
| ENST00000261170 | MCP0012594 | MMP0011166 | <i>GUCY2C</i>  | guanylate cyclase 2C                                                                | 0.0431 |
| ENST00000217026 | MCP0017044 | MMP0018634 | <i>MYBL2</i>   | v-myb avian myeloblastosis viral oncogene homolog-like 2                            | 0.0434 |

|                 |            |            |                  |                                                  |        |
|-----------------|------------|------------|------------------|--------------------------------------------------|--------|
| ENST00000261435 | MCP0000775 | MMP0019092 | <i>N4BP2</i>     | NEDD4 binding protein 2                          | 0.0434 |
| ENST00000427704 | MCP0016402 | MMP0009616 | <i>PHACTR2</i>   | phosphatase and actin regulator 2                | 0.0439 |
| ENST00000406927 | MCP0013369 | MMP0020781 | <i>METTL21A</i>  | methyltransferase like 21A                       | 0.0439 |
| ENST00000555619 | MCP0000558 | MMP0002393 | <i>NPC2</i>      | Niemann-Pick disease, type C2                    | 0.0442 |
| ENST00000222598 | MCP0019547 | MMP0016736 | <i>DLX5</i>      | distal-less homeobox 5                           | 0.0442 |
| ENST00000340360 | MCP0013583 | MMP0011026 | <i>XRRA1</i>     | X-ray radiation resistance associated 1          | 0.0443 |
| ENST00000392542 | MCP0009499 | MMP0015985 | <i>RFC5</i>      | replication factor C (activator 1) 5, 36.5kDa    | 0.0449 |
| ENST00000286096 | MCP0010880 | MMP0012089 | <i>KDM8</i>      | lysine (K)-specific demethylase 8                | 0.0450 |
| ENST00000447830 | MCP0010287 | MMP0008659 | <i>SPATC1</i>    | spermatogenesis and centriole associated 1       | 0.0450 |
| ENST00000216445 | MCP0013018 | MMP0019280 | <i>C14orf105</i> | chromosome 14 open reading frame 105             | 0.0453 |
| ENST00000265983 | MCP0001047 | MMP0002130 | <i>HPX</i>       | hemopexin                                        | 0.0453 |
| ENST00000257789 | MCP0012558 | MMP0017456 | <i>ORC3</i>      | origin recognition complex, subunit 3            | 0.0461 |
| ENST00000403389 | MCP0007994 | MMP0013200 | <i>OSM</i>       | oncostatin M                                     | 0.0464 |
| ENST00000257189 | MCP0014019 | MMP0017373 | <i>DSG3</i>      | desmoglein 3                                     | 0.0467 |
| ENST00000411463 | MCP0005155 | MMP0008143 | <i>R3HCCI</i>    | R3H domain and coiled-coil containing 1          | 0.0471 |
| ENST00000297581 | MCP0011582 | MMP0010726 | <i>DCSTAMP</i>   | dendrocyte expressed seven transmembrane protein | 0.0474 |
| ENST00000281282 | MCP0010015 | MMP0015394 | <i>CGNLI</i>     | cingulin-like 1                                  | 0.0475 |
| ENST00000378588 | MCP0013522 | MMP0014350 | <i>CYBB</i>      | cytochrome b-245, beta polypeptide               | 0.0475 |
| ENST00000312777 | MCP0009217 | MMP0002230 | <i>TCHP</i>      | trichoplein, keratin filament binding            | 0.0479 |
| ENST00000434748 | MCP0001658 | MMP0022723 | <i>FBRSLI</i>    | fibrosin-like 1                                  | 0.0484 |
| ENST00000585618 | MCP0004820 | MMP0000552 | <i>SEC14L1</i>   | SEC14-like 1 (S. cerevisiae)                     | 0.0485 |
| ENST00000498508 | MCP0004308 | MMP0022478 | <i>PROX1</i>     | prospero homeobox 1                              | 0.0490 |
| ENST00000325203 | MCP0005437 | MMP0008689 | <i>ANGPT2</i>    | angiopoietin 2                                   | 0.0490 |
| ENST00000389005 | MCP0000413 | MMP0022658 | <i>C17orf85</i>  | chromosome 17 reading frame 85                   | 0.0493 |
| ENST00000296137 | MCP0016953 | MMP0015637 | <i>FYCO1</i>     | FYVE and coiled-coil domain containing 1         | 0.0496 |

589

590

591

592

593

594

595

596

597

598 **Supplemental Table S9.2. List of the selected genes under positive selection in pangolins with their**  
599 **assigned functions or pathways.**

| Function                             | Genes                                                                                                                                                                                                                                                                                                                                                                                                                                                                                                                                                                                                                                                                                                                   | Function                                | Genes                                                                                                                                                      |
|--------------------------------------|-------------------------------------------------------------------------------------------------------------------------------------------------------------------------------------------------------------------------------------------------------------------------------------------------------------------------------------------------------------------------------------------------------------------------------------------------------------------------------------------------------------------------------------------------------------------------------------------------------------------------------------------------------------------------------------------------------------------------|-----------------------------------------|------------------------------------------------------------------------------------------------------------------------------------------------------------|
| <b>Immunity</b>                      | <u>Hematopoietic cell lineage</u><br><i>CD44, ITGA3, ITGAM, CD2, ANPEP, CSF3R</i><br><br><u>Cytokine-cytokine receptor interaction</u><br><i>LTBR, IL2RB, TNFRSF13B, IL13, BMPRI1B, CSF3R, OSM</i><br><br><u>Complement and coagulation cascades</u><br><i>F2, F2R, C8A, A2M, MASP2</i><br><br><u>Phagosome pathway</u><br><i>ATP6V0A2, MPO, RAB5B, ITGAM, CYBB</i><br><br><u>Ameobiasis pathway</u><br><i>LAMB2, COL1A2, RAB5B, COL4A4, ITGAM, C8A</i><br><br><u>Cytosolic DNA-sensing pathway</u> <i>TMEM173, RIPK3, POLR3G</i><br><br><u>Lysosome pathway</u><br><i>FUCA1, ATP6V0A2, ACP2, NPC2, ABCA2</i><br><br><u>Others</u><br><i>LTF, LY86, TNFRSF13B, MASP2, TIGIT, AKNA, HCLS1, TREM1, MAPK9, SIAE, ITGB7</i> | <b>Inflammation</b>                     | <i>LPCAT2, RAB18, CAPN5, CORO2A, LBP, ADAM17, REL, ITGAM, RIPK3, IL13, P2RX7, PTGER2, IL2RB, MPO, LTF, AHSG, LTBR, TREM1, LBP, F2R, ANGPT2, OSM, MASP2</i> |
| <b>Energy storage and metabolism</b> | <i>GP2, ASXL1, SLC19A1, SLC27A4, ACSM3, SLC35A2, HK3, CYP7A1, AHSG, CTBS, TPH1, ANPEP</i>                                                                                                                                                                                                                                                                                                                                                                                                                                                                                                                                                                                                                               | <b>Nervous system</b>                   | <i>KIF1B, DOCK6, UGT8, PRX, MAP2, KCNH4, MERTK, LAMB2, PNKP, RTN4</i>                                                                                      |
| <b>Mitochondrial metabolism</b>      | <i>ISCA2, SDHC, BCAT2, LETM1, ACAT1, GTPBP3, NDUFS4, FOXJ3, MRPS31, SLC25A19, HOGA1</i>                                                                                                                                                                                                                                                                                                                                                                                                                                                                                                                                                                                                                                 | <b>Osteogenesis</b>                     | <i>COL1A2, MSH3, BMPRI1B, SPP2, ACAN</i>                                                                                                                   |
| <b>Muscular</b>                      | <i>SGCG, NEBL, LDB3, FLNC, NEK8, LGALS2, RTCA, CACNG1, MYOZ3, TXLNB</i>                                                                                                                                                                                                                                                                                                                                                                                                                                                                                                                                                                                                                                                 | <b>Apoptosis</b>                        | <i>BIRC5, BIRC7, TOPBP1, APAF1</i>                                                                                                                         |
| <b>Hair/Scale</b>                    | <i>KRT75, KRT82, KRTAP3-1, SYNE4, KRT36</i>                                                                                                                                                                                                                                                                                                                                                                                                                                                                                                                                                                                                                                                                             | <b>Skin</b>                             | <i>P2RX7, KLK5</i>                                                                                                                                         |
| <b>Eye</b>                           | <i>KRT12, ADAMTS14</i>                                                                                                                                                                                                                                                                                                                                                                                                                                                                                                                                                                                                                                                                                                  | <b>Olfaction</b>                        | <i>ARHGEF40, NCDN</i>                                                                                                                                      |
| <b>Stress</b>                        | <i>USP15, RPA3</i>                                                                                                                                                                                                                                                                                                                                                                                                                                                                                                                                                                                                                                                                                                      | <b>ECM-receptor interaction pathway</b> | <i>LAMB2, ITGB7, COL1A2, CD44, ITGA3, COL4A4</i>                                                                                                           |

|                                                 |                                                        |                                 |                                   |     |
|-------------------------------------------------|--------------------------------------------------------|---------------------------------|-----------------------------------|-----|
| <b>Regulation of actin cytoskeleton pathway</b> | <i>ITGB7, F2, ITGA3, WASF1, FGF6, ITGAM, ENAH, F2R</i> | <b>Homologous recombination</b> | <i>POLD3, RPA3, BRCA2, RAD51B</i> | 603 |
| <b>Mismatch repair</b>                          | <i>RFC5, POLD3, RPA3, MSH3</i>                         |                                 |                                   | 604 |
|                                                 |                                                        |                                 |                                   | 605 |
|                                                 |                                                        |                                 |                                   | 606 |

**Supplemental Table S9.3. Positively-selected genes associated with known diseases.**

| <b>Function</b>                  | <b>Genes</b>                                                                                                                                                                       | <b>Function</b>                  | <b>Genes</b>                                                                                                            | 609                                           |
|----------------------------------|------------------------------------------------------------------------------------------------------------------------------------------------------------------------------------|----------------------------------|-------------------------------------------------------------------------------------------------------------------------|-----------------------------------------------|
| <b>Cancer or viral infection</b> | <i>KLK5, ABCB5, TOPBP1, SDHC, ST14, RET, MYBL2, HYAL2, KIAA1524, SLC19A1, CYP1A1, SH2D1A, BRCA2, BIRC7, ITGA3, MST1R, BIRC5, KLF4, MSH3, RAD51B, APAF1, CD44, POLH, DDIT3, CA9</i> | <b>Inflammation</b>              | <i>ADAM17, REL, ITGAM, RIPK3, IL13, P2RX7, PTGER2, IL2RB, MPO, LTF, AHSR, LTBR, TREM1, LBP, F2R, ANGPT2, OSM, MASP2</i> | 610<br>611<br>612<br>613<br>614<br>615<br>616 |
| <b>Bacterial infection</b>       | <i>SLC37A4, TREM1, ITGAM, IL13, P2RX7, LBP, MPO, LTF, MASP2, CYBB</i>                                                                                                              | <b>Pneumonia</b>                 | <i>LBP, TREM1, MPO, SFTPC, IL13, CYBB, MASP2</i>                                                                        |                                               |
| <b>Skin diseases</b>             | <i>KLK5, BRCA2, CYP1A1, MST1R, ST14, THEMIS2, HPS4, IL13, RAD51B, GJB3, ASIP, KRT75, CD44, POLH, DSG3</i>                                                                          | <b>Gastrointestinal diseases</b> | <i>CYP1A1, MST1R, BIRC5, KLF4, RET, MSH3, DKK4, GUCY2C, PTGER2, CD44, MST1, ANO1, MUC13, CA9</i>                        | 619<br>620<br>621<br>622                      |





|              |       |       |       |       |
|--------------|-------|-------|-------|-------|
| LTR Element  | 6.05% | 4.93% | 5.65% | 5.50% |
| DNA Elements | 2.90% | 2.76% | 3.02% | 3.13% |

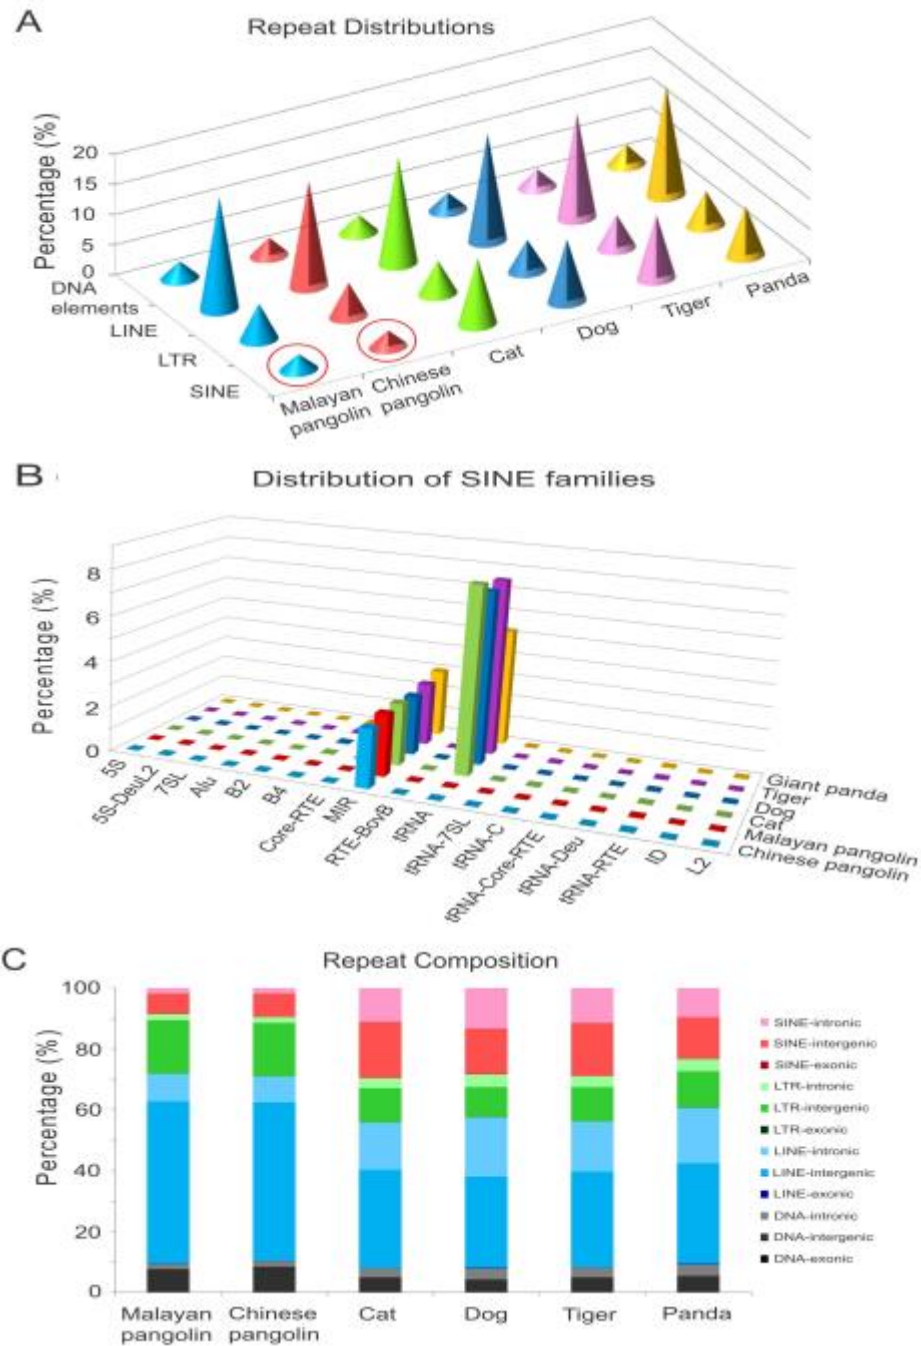

**Supplemental Figure S10.1. Repeats analysis.** (a) Major repeat elements found in selected mammalian species. The LTR, DNA elements and LINEs, except SINEs in pangolin genomes are comparable to other

mammals. (b) Distribution of SINE families across pangolins and closely related mammalian species. (c) Repeat composition by genome structures.

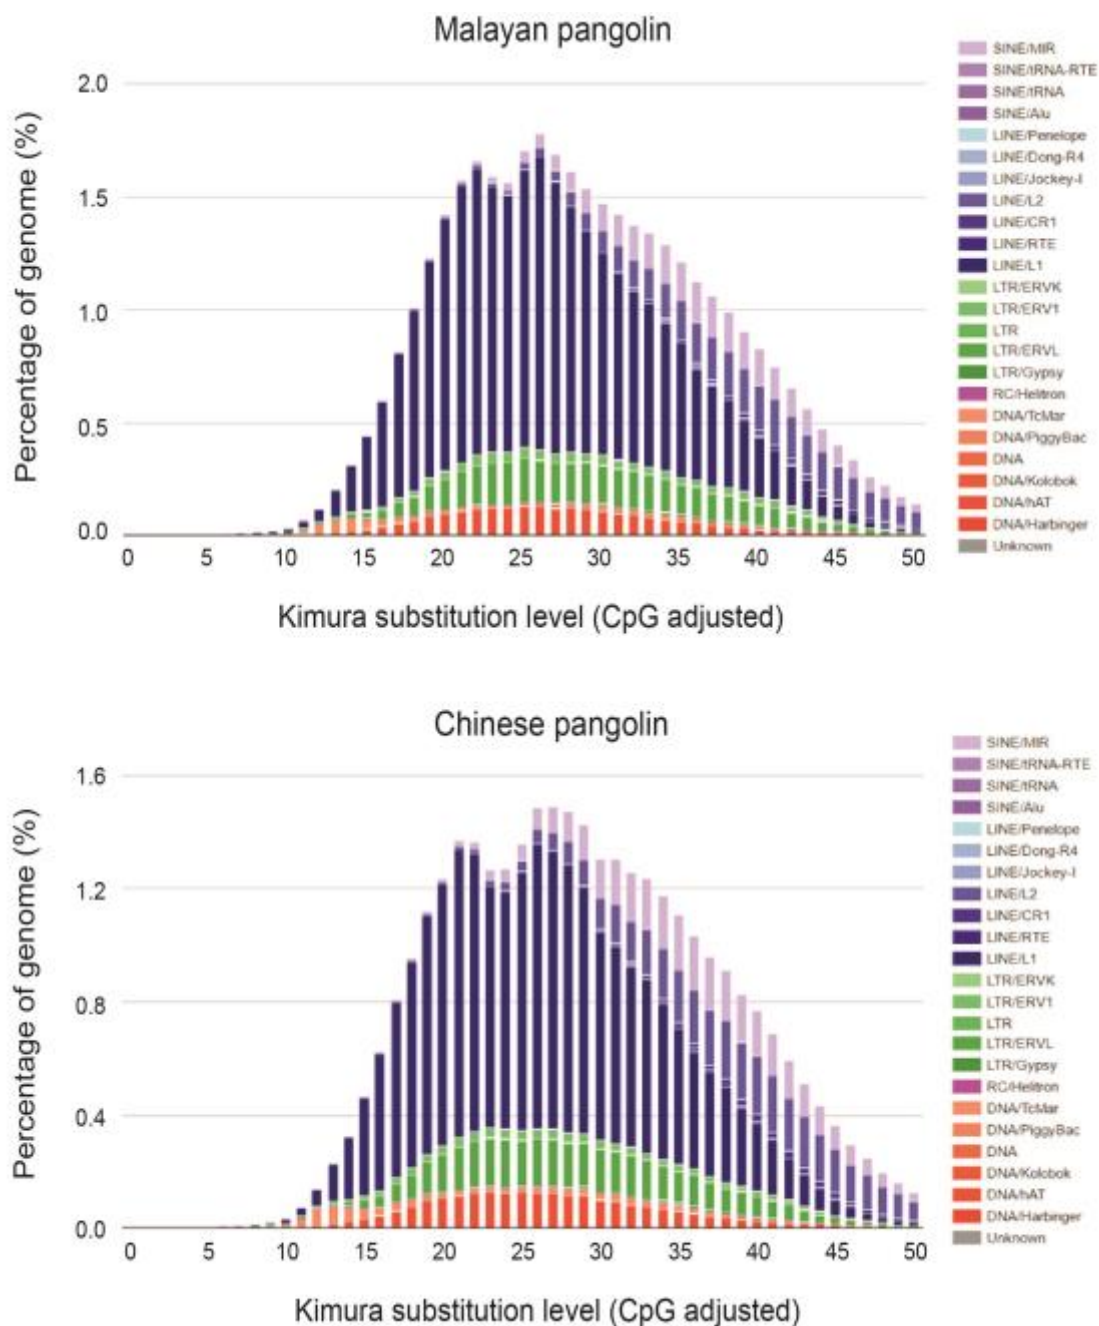

**Supplemental Figure S10.2. Comparison between the repeat landscapes of Malayan and Chinese pangolins.** No significant recent repeat family activity unique to either Malayan or Chinese pangolins was observed in this analysis.

**Supplemental Table S10.2. Summary of *de novo* repeats in the pangolin genomes.** Repeats were searched using RepeatMasker against the consensus repeat library generated using RepeatModeler.

|              | Malayan pangolin | Chinese pangolin |
|--------------|------------------|------------------|
| LINE         | 19.19%           | 16.37%           |
| SINE         | 1.41%            | 1.11%            |
| LTR Element  | 5.83%            | 5.07%            |
| DNA Elements | 1.86%            | 1.81%            |
| Unclassified | 0.89%            | 1.22%            |

## 10.2 Tandem repeats

TRF output was processed with Trevis software to compute basic statistics for tandem repeats. It is mostly the estimation of assembly quality because tandem repeats is the hardest genome part for assembly. Statistics of the identified tandem repeats are summarised in Supplementary Table 10.3.

**Supplemental Table S10.3. Tandem repeat identification for both pangolin species.**

|             | Malayan pangolin | Chinese pangolin |
|-------------|------------------|------------------|
| TRs all     | 922,360          | 381,505          |
| TRs complex | 4,401            | 2,510            |
| TRs >1kb    | 1,800            | 5,701            |
| TRs >3kb    | 546              | 1,351            |
| TRs >10kb   | 81               | 43               |

## 11.0 SHORT NOTES ON PANGOLIN MUSCULOSKELETAL SYSTEM

Pangolins have unique adaptations to their musculoskeletal system. Firstly, pangolins have evolved and adapted for special muscles allowing them to close their ears and nostrils to protect them from the attack of insects and preventing ants and termites from escaping in mouth. Secondly, pangolins have extremely elongated and muscular tongues that can flicks in and out quickly for capturing the ants and termites. Thirdly, the toothless pangolins have strong stomach

muscles with keratinous spines to digest its food through strong muscle contraction. Fourthly, Pangolins can roll into tight balls with their strong muscles, when threatened by predators.

## 12.0 REFERENCES

- Trevis: a tool for search and visualisation of large and complex tandem repeats at <https://github.com/ad3002/Trevis>.
- Andrews S. FastQC: A quality control tool for high throughput sequence data at <http://www.bioinformatics.babraham.ac.uk/projects/fastqc>.
- Bradnam KR, Fass JN, Alexandrov A, Baranay P, Bechner M, Birol I, Boisvert S, Chapman JA, Chapuis G, Chikhi R et al. 2013. Assemblathon 2: evaluating de novo methods of genome assembly in three vertebrate species. *GigaScience* **2**(1): 10.
- Cantarel BL, Korf I, Robb SM, Parra G, Ross E, Moore B, Holt C, Sanchez Alvarado A, Yandell M. 2008. MAKER: an easy-to-use annotation pipeline designed for emerging model organism genomes. *Genome Res* **18**(1): 188-196.
- Castresana J. 2000. Selection of conserved blocks from multiple alignments for their use in phylogenetic analysis. *Molecular biology and evolution* **17**(4): 540-552.
- Chan PP, Lowe TM. 2009. GtRNAdb: a database of transfer RNA genes detected in genomic sequence. *Nucleic acids research* **37**(Database issue): D93-97.
- Choi Y, Chan AP. 2015. PROVEAN web server: a tool to predict the functional effect of amino acid substitutions and indels. *Bioinformatics* **31**(16): 2745-2747.
- Cingolani P, Platts A, Wang le L, Coon M, Nguyen T, Wang L, Land SJ, Lu X, Ruden DM. 2012. A program for annotating and predicting the effects of single nucleotide polymorphisms, SnpEff: SNPs in the genome of *Drosophila melanogaster* strain w1118; iso-2; iso-3. *Fly* **6**(2): 80-92.
- Conesa A, Gotz S, Garcia-Gomez JM, Terol J, Talon M, Robles M. 2005. Blast2GO: a universal tool for annotation, visualization and analysis in functional genomics research. *Bioinformatics* **21**(18): 3674-3676.
- De Bie T, Cristianini N, Demuth JP, Hahn MW. 2006. CAFE: a computational tool for the study of gene family evolution. *Bioinformatics* **22**(10): 1269-1271.
- Delcher AL, Salzberg SL, Phillippy AM. 2003. Using MUMmer to identify similar regions in large sequence sets. *Current protocols in bioinformatics / editorial board, Andreas D Baxevanis [et al]* **Chapter 10**: Unit 10 13.
- Gokcumen O, Tischler V, Tica J, Zhu Q, Iskow RC, Lee E, Fritz MH, Langdon A, Stutz AM, Pavlidis P et al. 2013. Primate genome architecture influences structural variation mechanisms and functional consequences. *Proceedings of the National Academy of Sciences of the United States of America* **110**(39): 15764-15769.
- Grabherr MG, Haas BJ, Yassour M, Levin JZ, Thompson DA, Amit I, Adiconis X, Fan L, Raychowdhury R, Zeng Q et al. 2011. Full-length transcriptome assembly from RNA-Seq data without a reference genome. *Nature biotechnology* **29**(7): 644-652.
- Griffiths-Jones S. 2006. miRBase: the microRNA sequence database. *Methods in molecular biology* **342**: 129-138.
- Griffiths-Jones S, Saini HK, van Dongen S, Enright AJ. 2008. miRBase: tools for microRNA genomics. *Nucleic acids research* **36**(Database issue): D154-158.
- Gurevich A, Saveliev V, Vyahhi N, Tesler G. 2013. QUAST: quality assessment tool for genome assemblies. *Bioinformatics* **29**(8): 1072-1075.
- Huang Y, Niu B, Gao Y, Fu L, Li W. 2010. CD-HIT Suite: a web server for clustering and comparing biological sequences. *Bioinformatics* **26**(5): 680-682.

- Johnson LS, Eddy SR, Portugaly E. 2010. Hidden Markov model speed heuristic and iterative HMM search procedure. *BMC Bioinformatics* **11**: 431.
- Jones P, Binns D, Chang HY, Fraser M, Li W, McAnulla C, McWilliam H, Maslen J, Mitchell A, Nuka G et al. 2014. InterProScan 5: genome-scale protein function classification. *Bioinformatics* **30**(9): 1236-1240.
- Jurka J. 2000. Repbase update: a database and an electronic journal of repetitive elements. *Trends Genet* **16**(9): 418-420.
- Kadri S, Hinman V, Benos PV. 2009. HHMMiR: efficient de novo prediction of microRNAs using hierarchical hidden Markov models. *BMC Bioinformatics* **10 Suppl 1**: S35.
- Kielbasa SM, Wan R, Sato K, Horton P, Frith MC. 2011. Adaptive seeds tame genomic sequence comparison. *Genome Res* **21**(3): 487-493.
- Ksepka DT, Parham JF, Allman JF, Benton MJ, Carrano MT, Cranston KA, Donoghue PC, Head JJ, Hermsen EJ, Irmis RB et al. 2015. The Fossil Calibration Database-A New Resource for Divergence Dating. *Systematic biology*.
- Langmead B, Salzberg SL. 2012. Fast gapped-read alignment with Bowtie 2. *Nature methods* **9**(4): 357-359.
- Lechner M, Hernandez-Rosales M, Doerr D, Wieseke N, Thevenin A, Stoye J, Hartmann RK, Prohaska SJ, Stadler PF. 2014. Orthology detection combining clustering and synteny for very large datasets. *PloS one* **9**(8): e105015.
- Li H, Coghlan A, Ruan J, Coin LJ, Heriche JK, Osmotherly L, Li R, Liu T, Zhang Z, Bolund L et al. 2006. TreeFam: a curated database of phylogenetic trees of animal gene families. *Nucleic acids research* **34**(Database issue): D572-580.
- Li H, Handsaker B, Wysoker A, Fennell T, Ruan J, Homer N, Marth G, Abecasis G, Durbin R, Genome Project Data Processing S. 2009. The Sequence Alignment/Map format and SAMtools. *Bioinformatics* **25**(16): 2078-2079.
- Liu Y, Schroder J, Schmidt B. 2013. Musket: a multistage k-mer spectrum-based error corrector for Illumina sequence data. *Bioinformatics* **29**(3): 308-315.
- Lowe TM, Eddy SR. 1997. tRNAscan-SE: a program for improved detection of transfer RNA genes in genomic sequence. *Nucleic acids research* **25**(5): 955-964.
- Luo R, Liu B, Xie Y, Li Z, Huang W, Yuan J, He G, Chen Y, Pan Q, Liu Y et al. 2012. SOAPdenovo2: an empirically improved memory-efficient short-read de novo assembler. *GigaScience* **1**(1): 18.
- Martin PS, and Richard G. Klein. 1989. *Quaternary extinctions: a prehistoric revolution*. University of Arizona Press.
- McKenna A, Hanna M, Banks E, Sivachenko A, Cibulskis K, Kernytsky A, Garimella K, Altshuler D, Gabriel S, Daly M et al. 2010. The Genome Analysis Toolkit: a MapReduce framework for analyzing next-generation DNA sequencing data. *Genome Res* **20**(9): 1297-1303.
- Parra G, Bradnam K, Korf I. 2007. CEGMA: a pipeline to accurately annotate core genes in eukaryotic genomes. *Bioinformatics* **23**(9): 1061-1067.
- Pearson WR, Lipman DJ. 1988. Improved tools for biological sequence comparison. *Proceedings of the National Academy of Sciences of the United States of America* **85**(8): 2444-2448.
- R. A. FigTree at <<http://tree.bio.ed.ac.uk/software/figtree>>.
- Rambaut A SM, Xie D & Drummond AJ. 2014. Tracer v1.6.
- Rice P, Longden I, Bleasby A. 2000. EMBOSS: the European Molecular Biology Open Software Suite. *Trends Genet* **16**(6): 276-277.
- Schmieder R, Edwards R. 2011. Quality control and preprocessing of metagenomic datasets. *Bioinformatics* **27**(6): 863-864.
- Simpson JT, Durbin R. 2012. Efficient de novo assembly of large genomes using compressed data structures. *Genome Res* **22**(3): 549-556.

770 Smit A, Hubley, R & Green, P. 2013-2015. RepeatMasker Open-4.0.  
 771 Vassetzky NS, Kramerov DA. 2002. CAN--a pan-carnivore SINE family. *Mammalian genome :*  
 772 *official journal of the International Mammalian Genome Society* **13**(1): 50-57.  
 773 Vezzi F, Narzisi G, Mishra B. 2012. Reevaluating assembly evaluations with feature response  
 774 curves: GAGE and assemblathons. *PloS one* **7**(12): e52210.  
 775 Wu TD, Watanabe CK. 2005. GMAP: a genomic mapping and alignment program for mRNA  
 776 and EST sequences. *Bioinformatics* **21**(9): 1859-1875.  
 777 Wu Y, Wei B, Liu H, Li T, Rayner S. 2011. MiRPara: a SVM-based software tool for prediction of  
 778 most probable microRNA coding regions in genome scale sequences. *BMC*  
 779 *Bioinformatics* **12**: 107.  
 780 Xue W, Li JT, Zhu YP, Hou GY, Kong XF, Kuang YY, Sun XW. 2013. L\_RNA\_scaffolder:  
 781 scaffolding genomes with transcripts. *BMC Genomics* **14**: 604.  
 782 Yang Z. 2007. PAML 4: phylogenetic analysis by maximum likelihood. *Molecular biology and*  
 783 *evolution* **24**(8): 1586-1591.  
 784 Zerbino DR, Birney E. 2008. Velvet: algorithms for de novo short read assembly using de Bruijn  
 785 graphs. *Genome Res* **18**(5): 821-829.  
 786 Zhang Z, Carriero N, Zheng D, Karro J, Harrison PM, Gerstein M. 2006. PseudoPipe: an  
 787 automated pseudogene identification pipeline. *Bioinformatics* **22**(12): 1437-1439.  
 788
